# Supplementary material for: Copper-catalyzed and iodide-promoted aerobic C–C bond cleavage/C–N bond formation toward the synthesis of amides
Source: Royal Society of Chemistry journal article supplement (doi:10.1039/c6ra02153k), 2016-01-01
Supplement: c6ra02153k1.pdf [file c6ra02153k1.pdf]

# Supporting Information

## Copper Catalyzed and Iodide Promoted Aerobic C-C Bond Cleavage/C-N Bond Formation toward the Synthesis of Amides

*Kun Wu,<sup>a</sup> Zhiliang Huang,<sup>a</sup> Yiyang Ma,<sup>a</sup> and Aiwen Lei<sup>a,b\*</sup>*

<sup>a</sup>College of Chemistry and Molecular Sciences, the Institute for Advanced Studies (IAS), Wuhan University, Wuhan, Hubei, 430072, P. R. China

<sup>b</sup>State Key Laboratory for Oxo Synthesis and Selective Oxidation, Lanzhou Institute of Chemical Physics, Chinese Academy of Sciences, Lanzhou, 730000, P. R. China;

E-mail: [aiwenlei@whu.edu.cn](mailto:aiwenlei@whu.edu.cn)

|                                                                           |            |
|---------------------------------------------------------------------------|------------|
| <b>1. General information.....</b>                                        | <b>S2</b>  |
| <b>2. General procedure for the synthesis of amides .....</b>             | <b>S2</b>  |
| <b>3. O<sup>18</sup> labeling experiments.....</b>                        | <b>S3</b>  |
| <b>4. Detail descriptions of products.....</b>                            | <b>S6</b>  |
| <b>5. References.....</b>                                                 | <b>S9</b>  |
| <b>6. Copies of product <sup>1</sup>H NMR and <sup>13</sup>C NMR.....</b> | <b>S10</b> |

## General information

The reactions were conducted under oxygen atmosphere with a balloon fitted on a Schlenk tube. All glassware was oven dried at 110 °C for hours and cooled down under vacuum. NMP was purified by distillation with calcium hydride. Unless otherwise noted, materials were obtained from commercial suppliers and used without further purification. Imines were prepared following literature procedures. Thin layer chromatography (TLC) employed glass 0.25 mm silica gel plates. Flash chromatography columns were packed with 100-200 mesh silica gel in petroleum (bp. 60-90 °C). GC-MS spectra were recorded on a Varian GC-MS 3900-2100T. NMR spectra were recorded on a Bruker Advance III spectrometers at 400 MHz (<sup>1</sup>H NMR), 100 MHz (<sup>13</sup>C NMR). Tetramethylsilane was used as an internal standard). All <sup>1</sup>H NMR spectra were reported in delta (δ) units, parts per million (ppm) downfield from the internal standard. Coupling constants (*J*) are reported in Hertz (Hz).

## General procedure

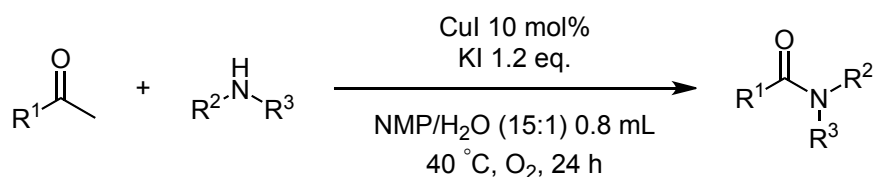

CuI (9.5 mg, 0.05 mmol), KI (99.6 mg, 0.60 mmol) was added in a Schlenk tube. The Schlenk tube was then sealed with septa and fitted with an oxygen balloon, filled with oxygen. NMP (0.75 mL), H<sub>2</sub>O (0.05 mL), ketone (0.5 mmol) and amine (1.0 mmol) were injected in the tube via a syringe. The reaction was then heated up to 40 °C. After stirring for 24 hours, it was quenched by water and extracted with ethyl ether (3 \* 10 mL). The organic layers were combined and pure product was obtained by flash column chromatography on silica gel (petroleum: ethyl acetate = 2:1).

## O<sup>18</sup> Labeling experiments

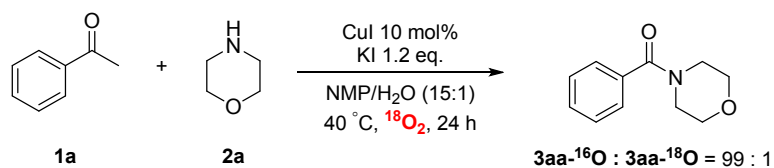

CuI (9.5 mg, 0.05 mmol), KI (99.6 mg, 0.60 mmol) was added in a Schlenk tube. The Schlenk tube was then sealed with septa and fitted with an <sup>18</sup>O<sub>2</sub> balloon, filled with <sup>18</sup>O<sub>2</sub>. NMP (0.75 mL), H<sub>2</sub>O (0.05 mL), **1a** (60 mg, 0.5 mmol) and **2aa** (87 mg, 1.0 mmol) were injected in the tube via a syringe. The reaction was then heated up to 40 °C. After stirring for 24 hours, it was quenched by water and extracted with ethyl ether, the organic layer was detected by GC-MS.

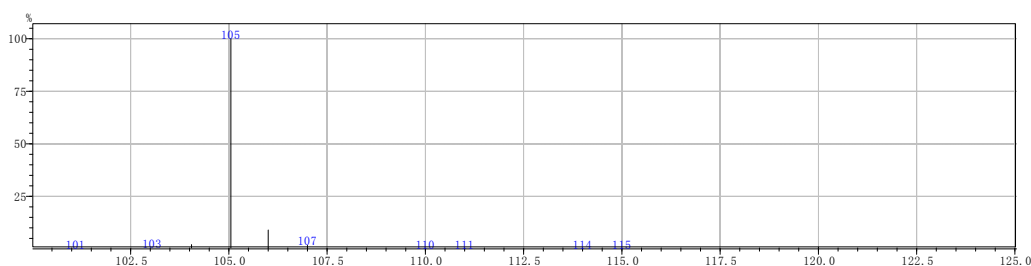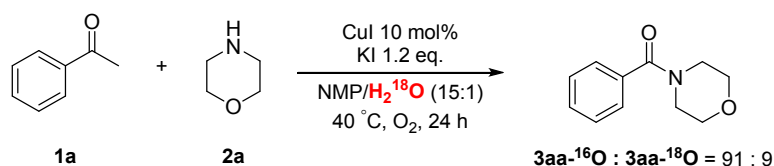

CuI (9.5 mg, 0.05 mmol), KI (99.6 mg, 0.60 mmol) was added in a Schlenk tube. The Schlenk tube was then sealed with septa and fitted with an O<sub>2</sub> balloon, filled with O<sub>2</sub>. NMP (0.75 mL), H<sub>2</sub><sup>18</sup>O (0.05 mL), **1a** (60 mg, 0.5 mmol) and **2aa** (87 mg, 1.0 mmol) were injected in the tube via a syringe. The reaction was then heated up to 40 °C. After stirring for 24 hours, it was quenched by water and extracted with ethyl ether, the organic layer was detected by GC-MS.

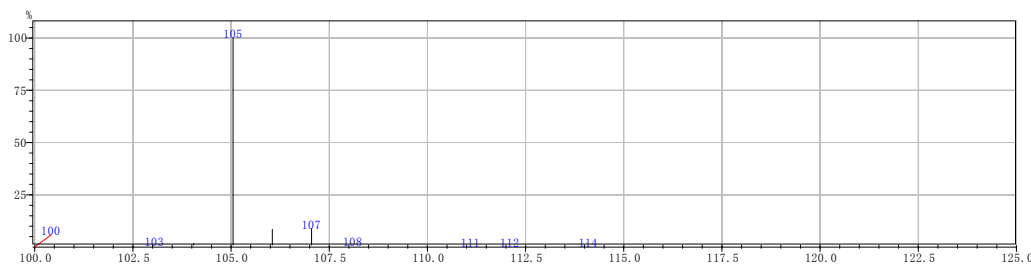

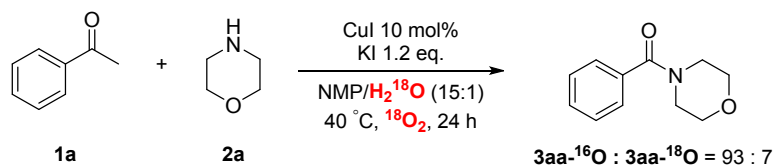

CuI (9.5 mg, 0.05 mmol), KI (99.6 mg, 0.60 mmol) was added in a Schlenk tube. The Schlenk tube was then sealed with septa and fitted with an  $^{18}\text{O}_2$  balloon, filled with  $^{18}\text{O}_2$ . NMP (0.75 mL),  $\text{H}_2^{18}\text{O}$  (0.05 mL),  $1\mathbf{a}$  (60 mg, 0.5 mmol) and  $2\mathbf{aa}$  (87 mg, 1.0 mmol) were injected in the tube via a syringe. The reaction was then heated up to 40 °C. After stirring for 24 hours, it was quenched by water and extracted with ethyl ether, the organic layer was detected by GC-MS.

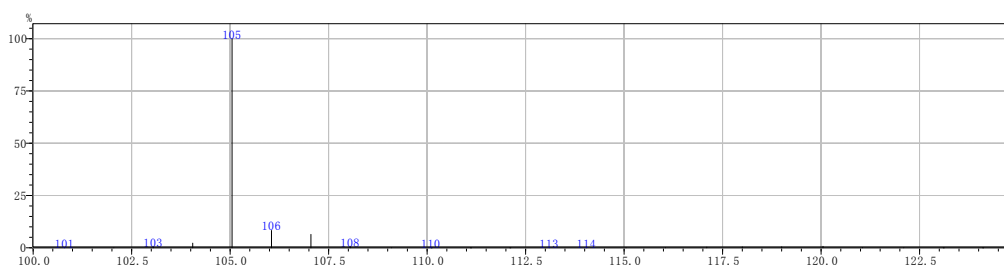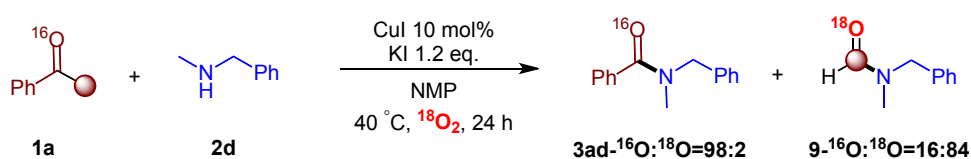

CuI (9.5 mg, 0.05 mmol), KI (99.6 mg, 0.60 mmol) was added in a Schlenk tube. The Schlenk tube was then sealed with septa and fitted with an  $^{18}\text{O}_2$  balloon, filled with  $^{18}\text{O}_2$ . NMP (0.75 mL),  $1\mathbf{a}$  (60 mg, 0.5 mmol) and  $2\mathbf{d}$  (121 mg, 1.0 mmol) were injected in the tube via a syringe. The reaction was then heated up to 40 °C. After stirring for 24 hours, it was quenched by water and extracted with ethyl ether, the organic layer was detected by GC-MS.

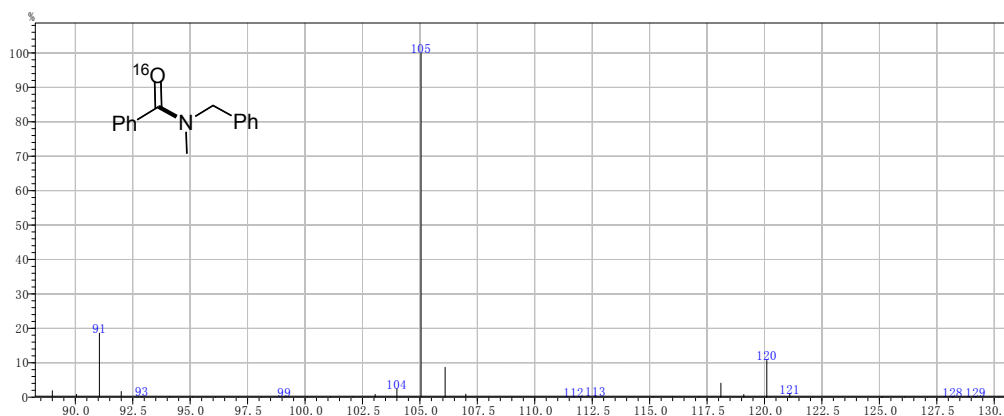

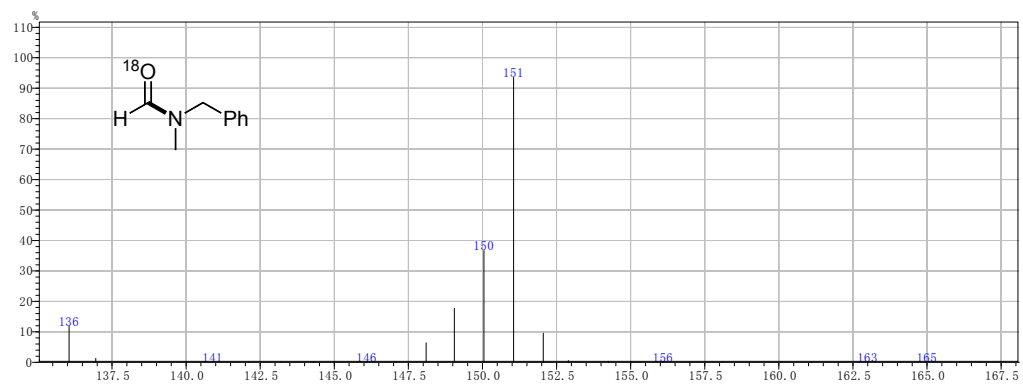

## Detail descriptions for products

### Morpholino(phenyl)methanone: 3aa<sup>1</sup>

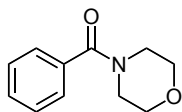

<sup>1</sup>H NMR (400 MHz, CDCl<sub>3</sub>) δ 7.48 – 7.32 (m, 5H), 3.97 – 3.24 (m, 8H).

<sup>13</sup>C NMR (101 MHz, CDCl<sub>3</sub>) δ 170.6, 135.4, 130.1, 128.7, 127.2, 67.0, 48.4, 42.7.

### Morpholino(4-(trifluoromethyl)phenyl)methanone: 3ba<sup>1</sup>

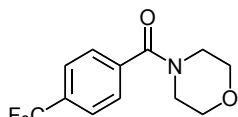

<sup>1</sup>H NMR (400 MHz, CDCl<sub>3</sub>) δ 7.70 (d, *J* = 8.0 Hz, 2H), 7.54 (d, *J* = 8.0 Hz, 2H), 3.98 – 3.13 (m, 8H).

<sup>13</sup>C NMR (101 MHz, CDCl<sub>3</sub>) δ 169.1, 139.1, 132.0 (q, *J* = 32.8 Hz), 127.7, 125.9 (q, *J* = 3.7 Hz), 123.9 (q, *J* = 273.4 Hz), 67.0, 48.3, 42.8.

<sup>19</sup>F NMR (377 MHz, CDCl<sub>3</sub>) δ -62.92.

### (4-Fluorophenyl)(morpholino)methanone: 3ca<sup>1</sup>

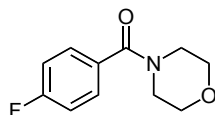

<sup>1</sup>H NMR (400 MHz, CDCl<sub>3</sub>) δ 7.50 – 7.37 (m, 2H), 7.16 – 7.06 (m, 2H), 3.95 – 3.37 (m, 8H).

<sup>13</sup>C NMR (101 MHz, CDCl<sub>3</sub>) δ 169.5, 163.5 (d, *J* = 251.1 Hz), 131.3 (d, *J* = 3.5 Hz), 129.5 (d, *J* = 8.5 Hz), 115.7 (d, *J* = 21.8 Hz), 66.8, 48.3, 42.7.

<sup>19</sup>F NMR (377 MHz, CDCl<sub>3</sub>) δ -109.88.

### (4-Bromophenyl)(morpholino)methanone: 3da<sup>1</sup>

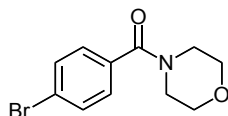

<sup>1</sup>H NMR (400 MHz, CDCl<sub>3</sub>) δ 7.57 (d, *J* = 8.4 Hz, 2H), 7.31 (d, *J* = 8.4 Hz, 2H), 4.04 – 3.21 (m, 8H).

<sup>13</sup>C NMR (101 MHz, CDCl<sub>3</sub>) δ 169.6, 134.3, 132.1, 129.1, 124.5, 67.1, 48.4, 42.8.

### (4-Iodophenyl)(morpholino)methanone: 3ea<sup>2</sup>

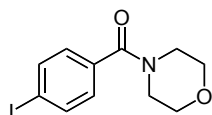

<sup>1</sup>H NMR (400 MHz, CDCl<sub>3</sub>) δ 7.92 – 7.65 (m, 2H), 7.21 – 7.03 (m, 2H), 3.89 – 2.99 (m, 8H).

<sup>13</sup>C NMR (101 MHz, CDCl<sub>3</sub>) δ 169.7, 138.0, 134.8, 129.1, 96.4, 67.0, 48.5, 42.8.

**(4-Methoxyphenyl)(morpholino)methanone: 3fa<sup>1</sup>**

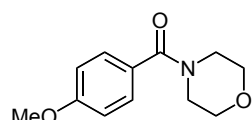

<sup>1</sup>H NMR (400 MHz, CDCl<sub>3</sub>) δ 7.38 (d, *J* = 8.8 Hz, 2H), 6.91 (d, *J* = 8.8 Hz, 2H), 3.82 (s, 3H), 3.68 (s, 8H).

<sup>13</sup>C NMR (101 MHz, CDCl<sub>3</sub>) δ 170.5, 161.0, 129.3, 127.4, 113.9, 67.0, 55.5.

**4-(Morpholine-4-carbonyl)benzonitrile: 3ga<sup>3</sup>**

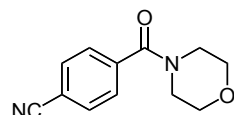

<sup>1</sup>H NMR (400 MHz, CDCl<sub>3</sub>) δ 7.74 (d, *J* = 8.4 Hz, 2H), 7.53 (d, *J* = 8.4 Hz, 2H), 3.94 – 3.06 (m, 8H).

<sup>13</sup>C NMR (101 MHz, CDCl<sub>3</sub>) δ 168.5, 139.8, 132.7, 128.0, 118.2, 113.8, 66.9, 48.2, 42.7.

**Morpholino(p-tolyl)methanone: 3ha<sup>1</sup>**

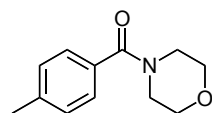

<sup>1</sup>H NMR (400 MHz, CDCl<sub>3</sub>) δ 7.31 (d, *J* = 8.4 Hz, 2H), 7.22 (d, *J* = 8.0 Hz, 2H), 3.95 – 3.19 (m, 8H), 2.38 (s, 3H).

<sup>13</sup>C NMR (101 MHz, CDCl<sub>3</sub>) δ 170.8, 140.3, 132.5, 129.3, 127.4, 67.1, 21.6.

**Morpholino(naphthalen-2-yl)methanone: 3ia<sup>4</sup>**

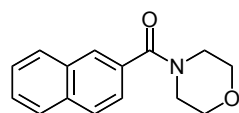

<sup>1</sup>H NMR (400 MHz, CDCl<sub>3</sub>) δ 8.07 – 7.73 (m, 4H), 7.60 – 7.42 (m, 3H), 4.06 – 3.35 (m, 8H).

<sup>13</sup>C NMR (101 MHz, CDCl<sub>3</sub>) δ 170.6, 133.9, 132.8, 132.7, 128.6, 128.6, 128.0, 127.4, 127.2, 127.0, 124.4, 67.1, 48.5, 42.8.

**(2-Chlorophenyl)(morpholino)methanone: 3ja<sup>5</sup>**

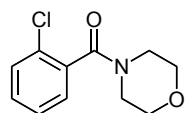

<sup>1</sup>H NMR (400 MHz, CDCl<sub>3</sub>) δ 7.43 – 7.26 (m, 4H), 3.94 – 3.83 (m, 1H), 3.80 – 3.65 (m, 4H), 3.62 – 3.55 (m, 1H), 3.32 – 3.15 (m, 2H).

<sup>13</sup>C NMR (101 MHz, CDCl<sub>3</sub>) δ 167.1, 135.5, 130.6, 130.4, 129.8, 128.0, 127.5, 66.9, 66.8, 47.3, 42.2.

**(3-Chlorophenyl)(morpholino)methanone: 3ka<sup>6</sup>**

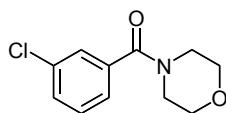

$^1\text{H NMR}$  (400 MHz,  $\text{CDCl}_3$ )  $\delta$  7.44 – 7.34 (m, 3H), 7.36 – 7.28 (m, 1H), 3.88 – 3.32 (m, 8H).

$^{13}\text{C NMR}$  (101 MHz,  $\text{CDCl}_3$ )  $\delta$  168.9, 137.2, 134.8, 130.2, 130.1, 127.4, 125.3, 67.0, 48.3, 42.7.

#### (4-Chlorophenyl)(morpholino)methanone: 3la<sup>1</sup>

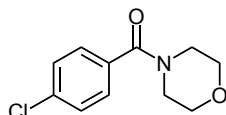

$^1\text{H NMR}$  (400 MHz,  $\text{CDCl}_3$ )  $\delta$  7.45 – 7.32 (m, 4H), 3.95 – 3.30 (m, 8H).

$^{13}\text{C NMR}$  (101 MHz,  $\text{CDCl}_3$ )  $\delta$  169.4, 136.0, 133.6, 128.9, 128.7, 66.8, 48.2, 42.7.

#### Phenyl(piperidin-1-yl)methanone: 3ab<sup>6</sup>

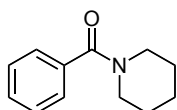

$^1\text{H NMR}$  (400 MHz,  $\text{CDCl}_3$ )  $\delta$  7.66 – 6.72 (m, 5H), 3.70 (s, 2H), 3.32 (s, 2H), 1.66 (s, 4H), 1.50 (s, 2H).

$^{13}\text{C NMR}$  (101 MHz,  $\text{CDCl}_3$ )  $\delta$  170.5, 136.7, 129.5, 128.6, 126.9, 48.9, 43.3, 26.7, 25.8, 24.8.

#### N,N-dibutylbenzamide: 3ac<sup>7</sup>

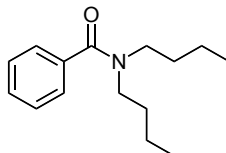

$^1\text{H NMR}$  (400 MHz,  $\text{CDCl}_3$ )  $\delta$  7.54 – 7.10 (m, 5H), 3.48 (d,  $J = 6.3$  Hz, 2H), 3.18 (s, 2H), 1.64 (d,  $J = 5.9$  Hz, 2H), 1.55 – 1.33 (m, 4H), 1.13 (d,  $J = 6.6$  Hz, 2H), 0.98 (d,  $J = 6.2$  Hz, 3H), 0.78 (s, 3H).

$^{13}\text{C NMR}$  (101 MHz,  $\text{CDCl}_3$ )  $\delta$  171.8, 137.5, 129.1, 128.5, 126.6, 48.9, 44.6, 31.0, 29.8, 20.5, 19.9, 14.1, 13.8.

#### N-benzyl-N-methylbenzamide: 3ad<sup>8</sup>

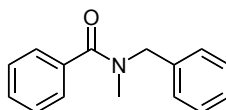

$^1\text{H NMR}$  (400 MHz,  $\text{CDCl}_3$ )  $\delta$  7.58 – 7.00 (m, 10H), 4.79 (s, 1H), 4.54 (s, 1H), 3.06 (s, 1.5H), 2.88 (s, 1.5H).

$^{13}\text{C NMR}$  (101 MHz,  $\text{CDCl}_3$ )  $\delta$  172.5, 171.8, 137.2, 136.8, 136.5, 129.8, 129.0, 128.6, 128.4, 127.7, 127.1, 127.0, 55.3, 51.0, 37.7, 33.4.

## References



1. W. Fang, Q. Deng, M. Xu and T. Tu, *Org. Lett.* 2013, **15**, 3678-3681.
2. W. Li and X.-F. Wu, *Org. Lett.* 2015, **17**, 1910-1913.
3. T. T. Dang, Y. Zhu, J. S. Y. Ngiam, S. C. Ghosh, A. Chen and A. M. Seayad, *ACS Catal.* 2013, **3**, 1406-1410.
4. C. G. Jørgensen, B. Frølund, J. Kehler and A. A. Jensen, *ChemMedChem* 2011, **6**, 725-736.
5. M. Pilo, A. Porcheddu and L. De Luca, *Org. Biomol. Chem.* 2013, **11**, 8241-8246.
6. J. Zhu, Y. Zhang, F. Shi and Y. Deng, *Tetrahedron Lett.* 2012, **53**, 3178-3180.
7. K. Azizi, M. Karimi and A. Heydari, *RSC Adv.* 2014, **4**, 31817-31820.
8. R. Vanjari, T. Guntreddi and K. N. Singh, *Green Chem.* 2014, **16**, 351-356.

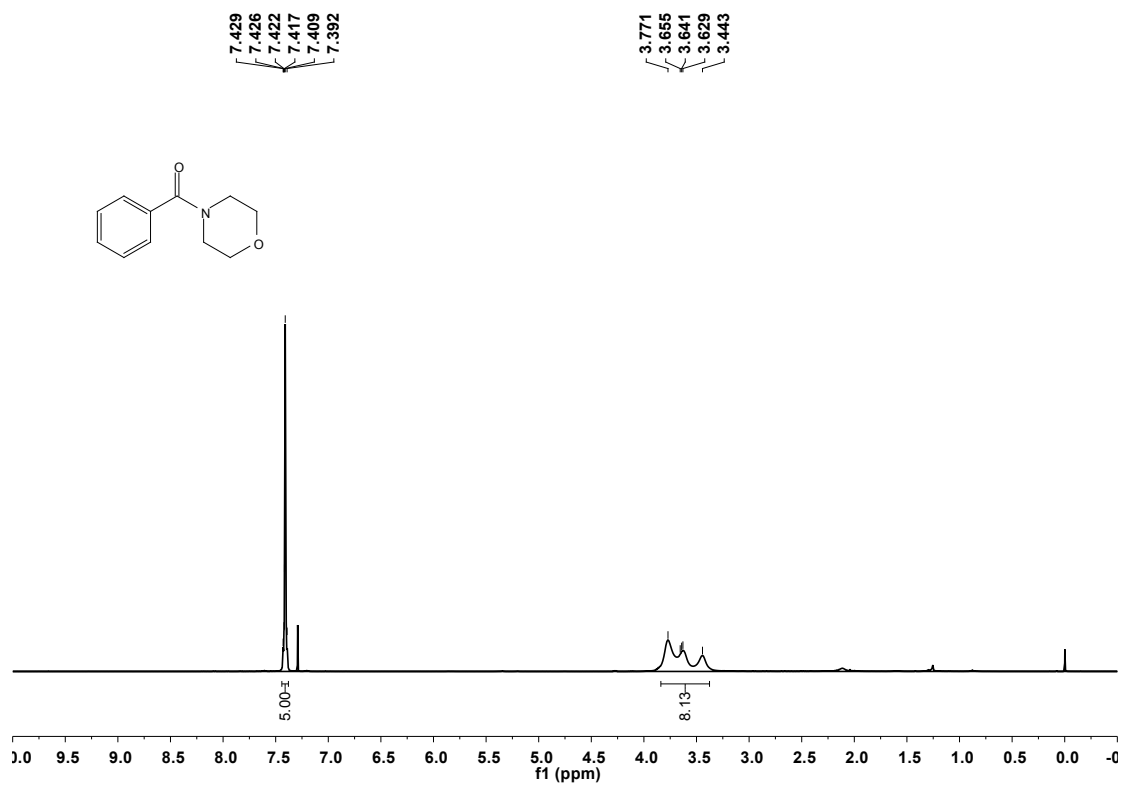

**<sup>1</sup>H NMR spectrum of morpholino(phenyl)methanone (3aa)**

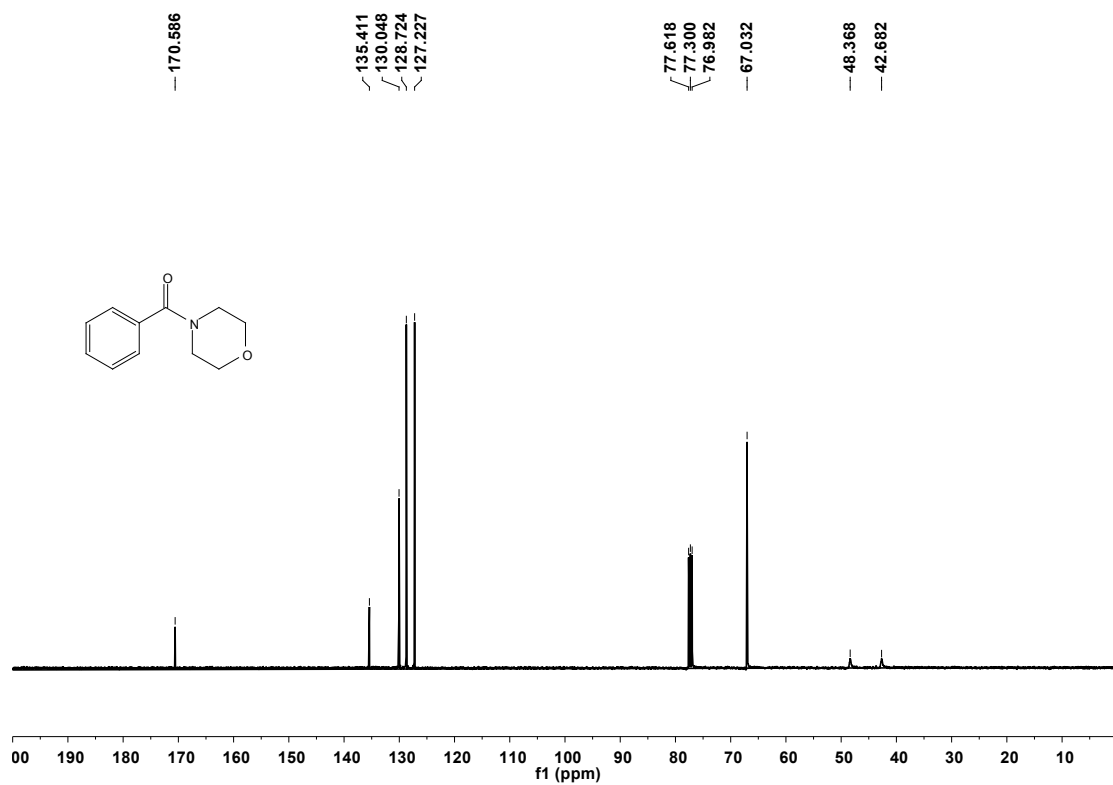

**<sup>13</sup>C NMR spectrum of morpholino(phenyl)methanone (3aa)**

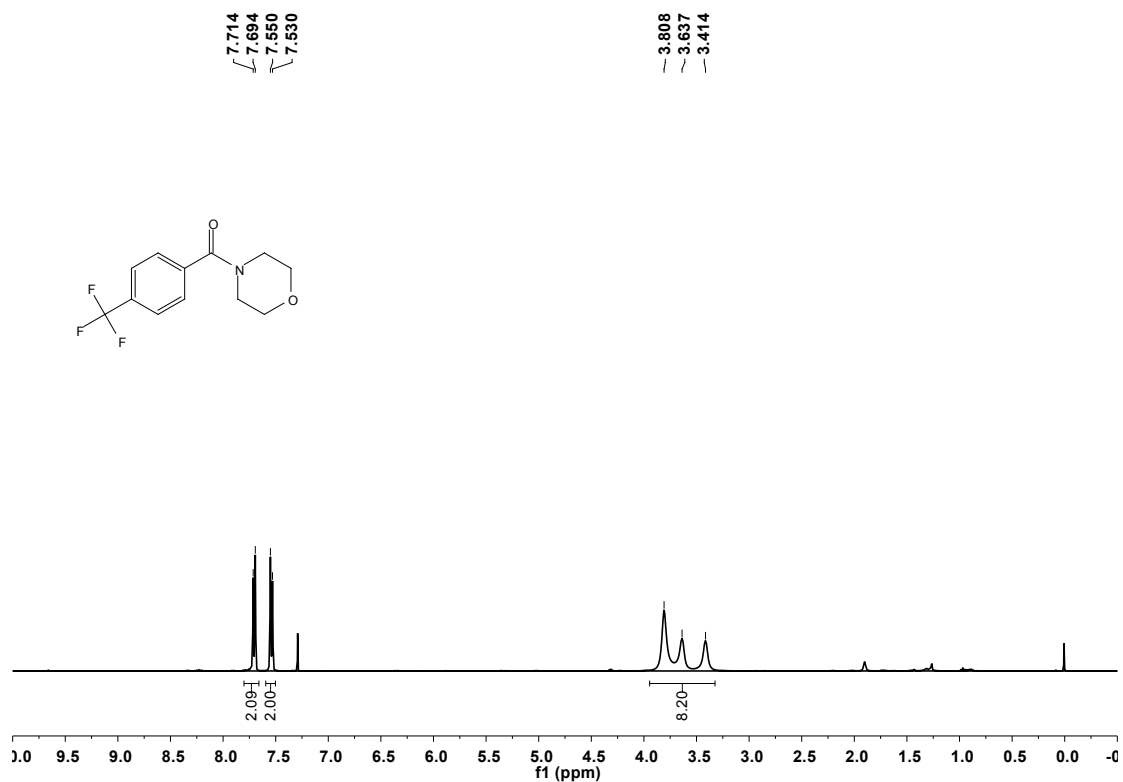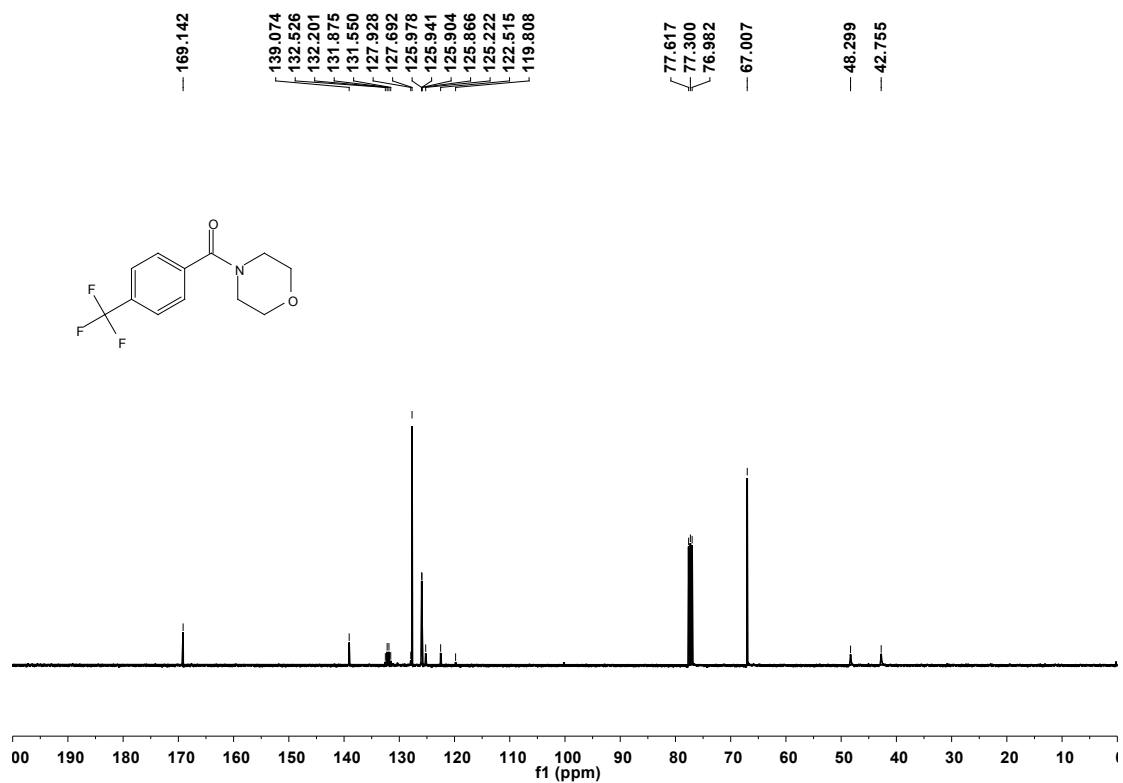

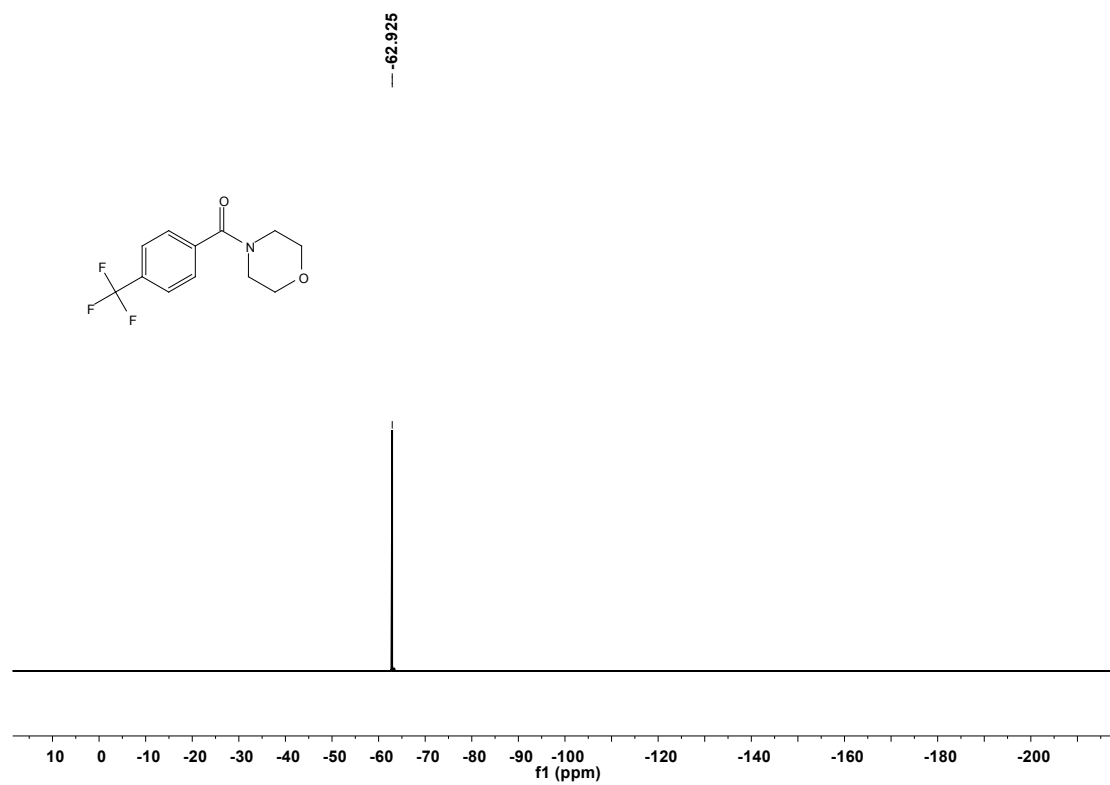

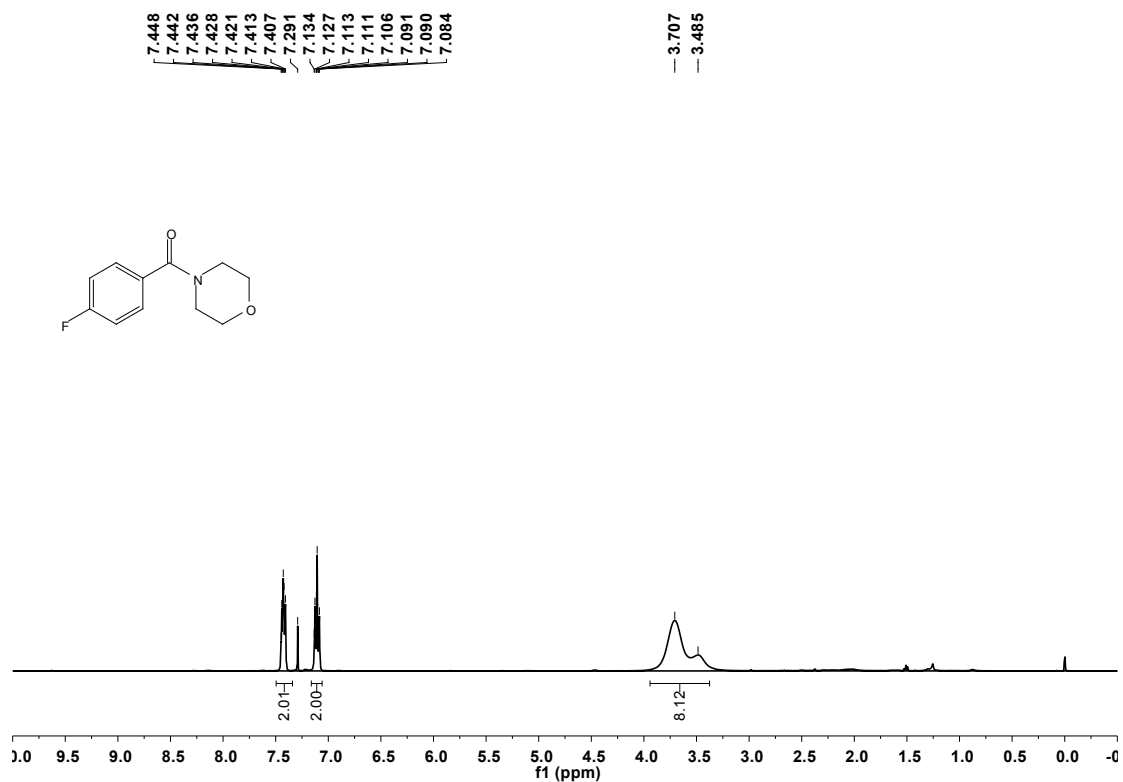

<sup>1</sup>H NMR spectrum of (4-fluorophenyl)(morpholino)methanone (3ca)

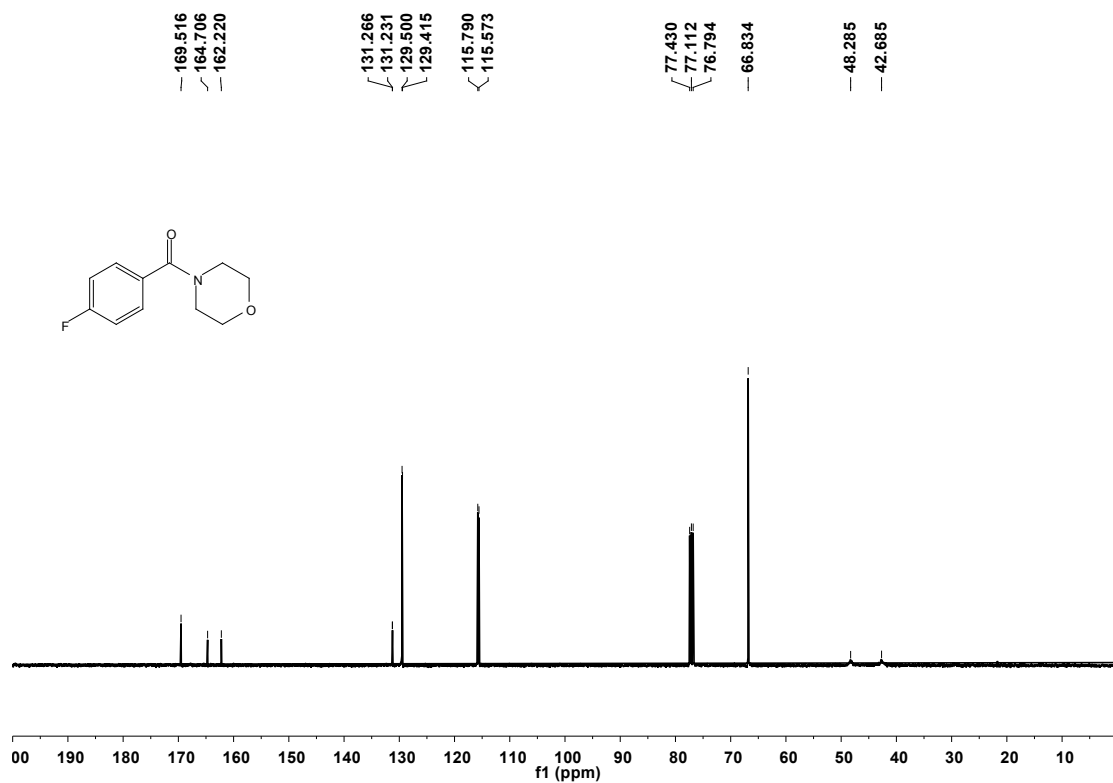

<sup>13</sup>C NMR spectrum of (4-fluorophenyl)(morpholino)methanone (3ca)

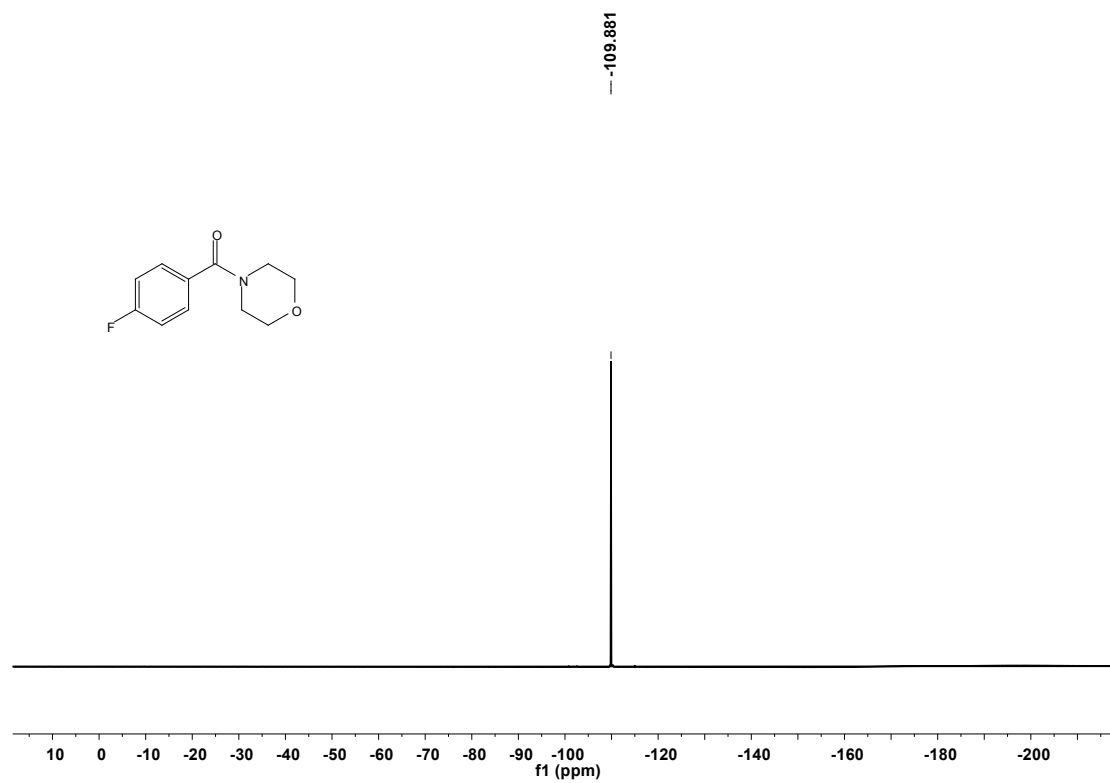

$^{19}\text{F}$  NMR spectrum of (4-fluorophenyl)(morpholino)methanone (3ca)

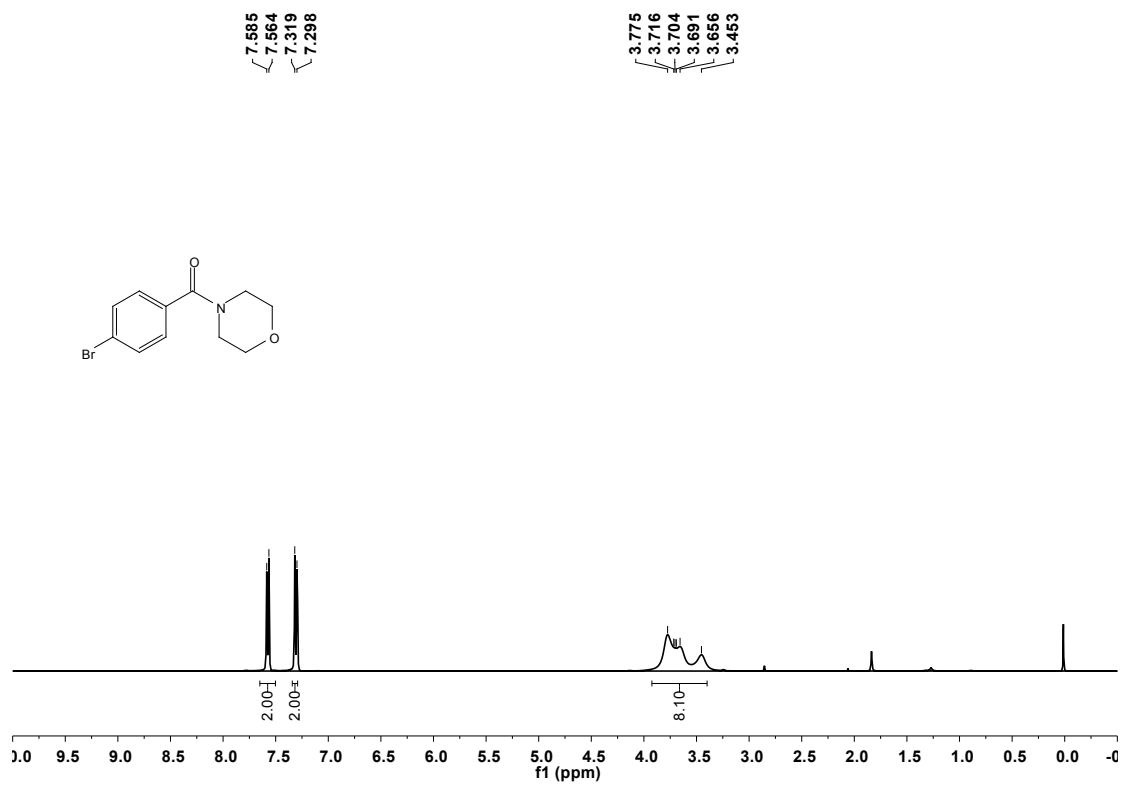

<sup>1</sup>H NMR spectrum of (4-bromophenyl)(morpholino)methanone (3da)

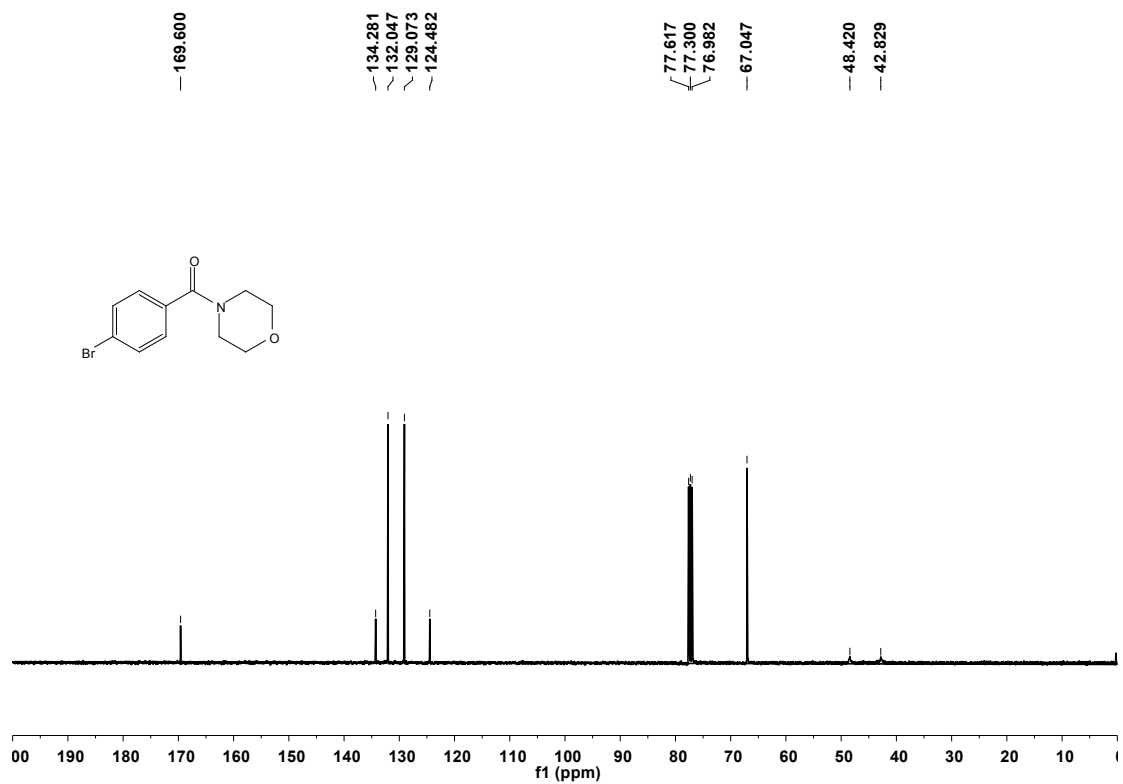

<sup>13</sup>C NMR spectrum of (4-bromophenyl)(morpholino)methanone (3da)

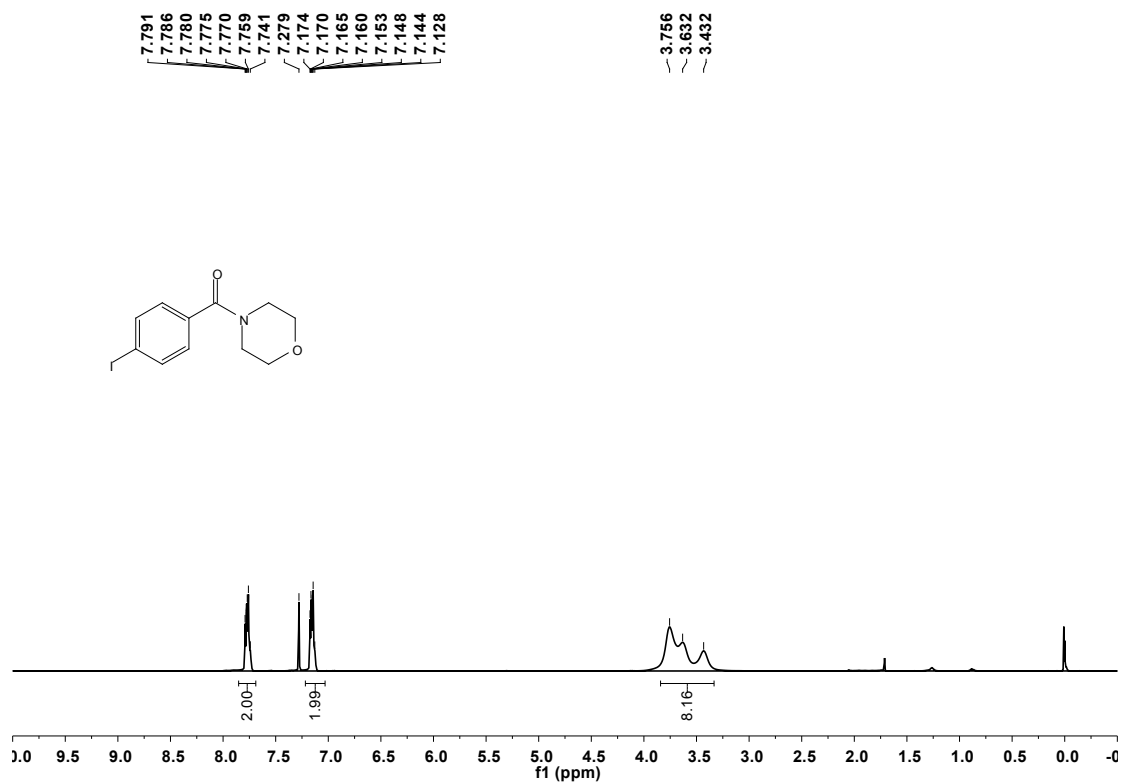

<sup>1</sup>H NMR spectrum of (4-iodophenyl)(morpholino)methanone (3ea)

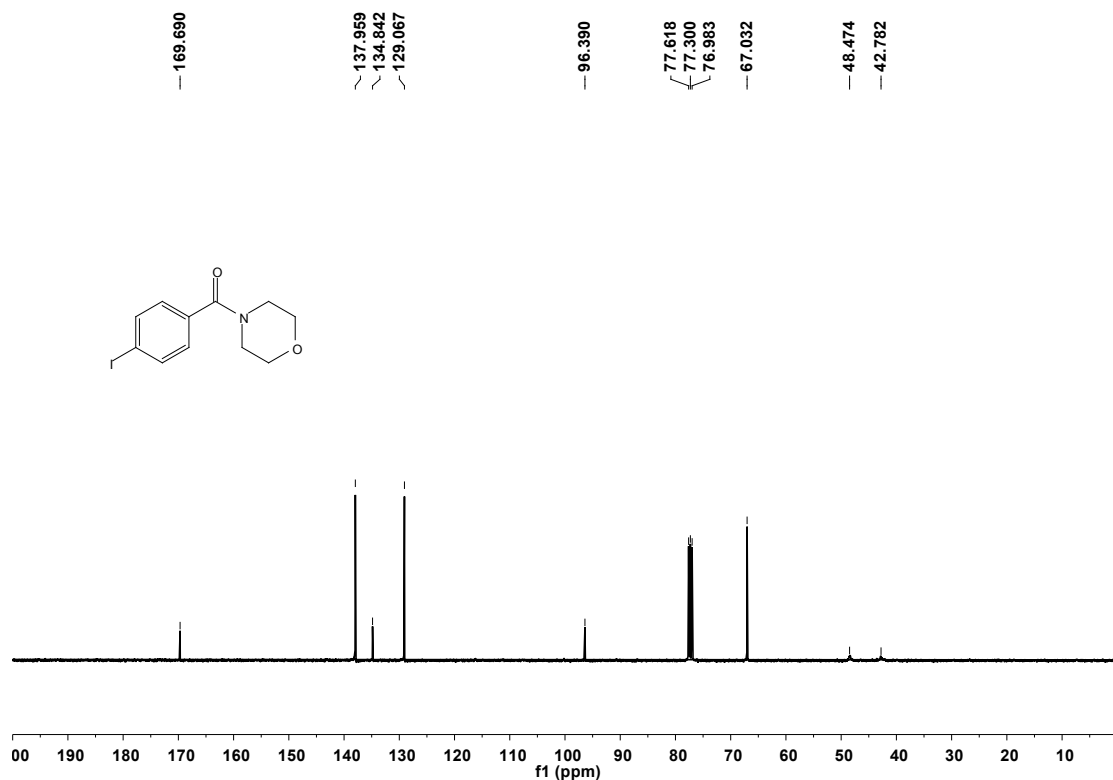

<sup>13</sup>C NMR spectrum of (4-iodophenyl)(morpholino)methanone (3ea)



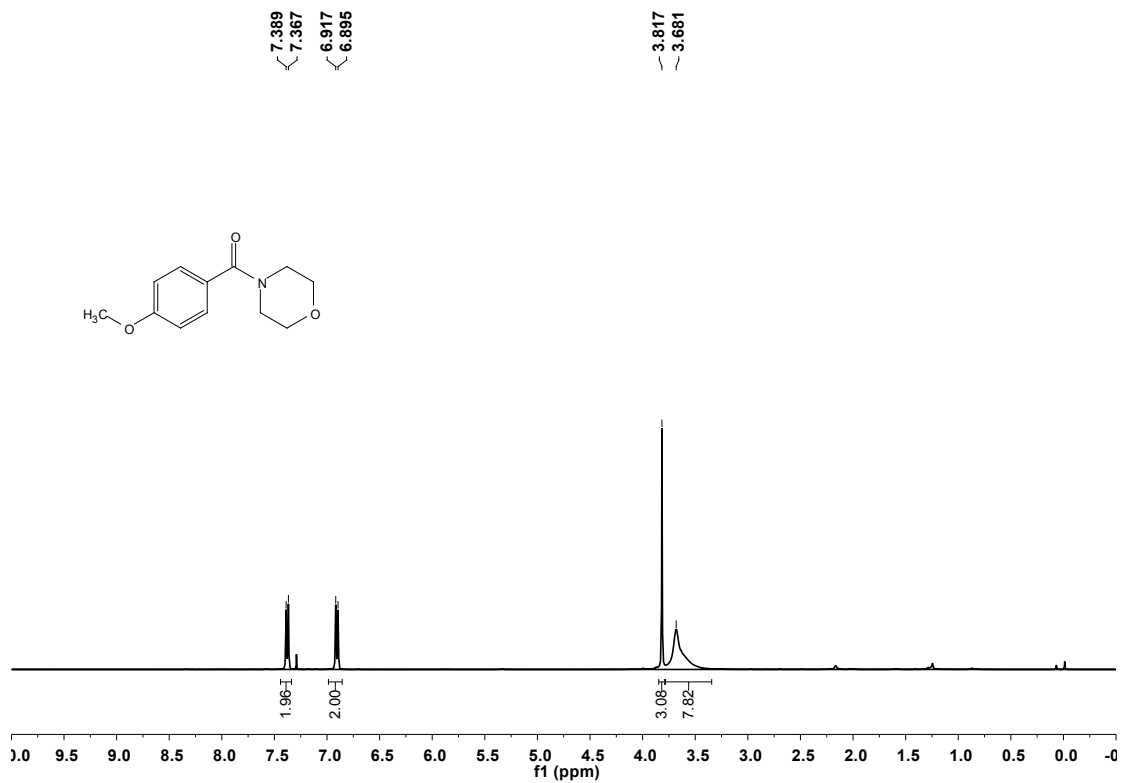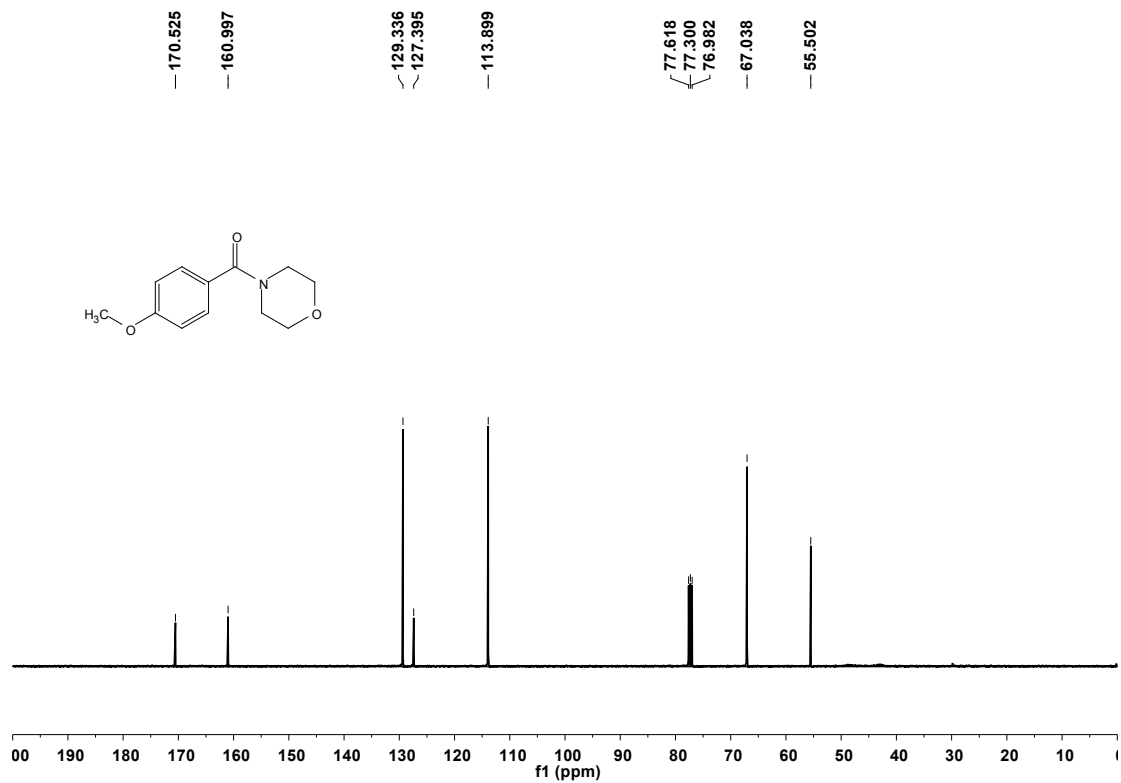

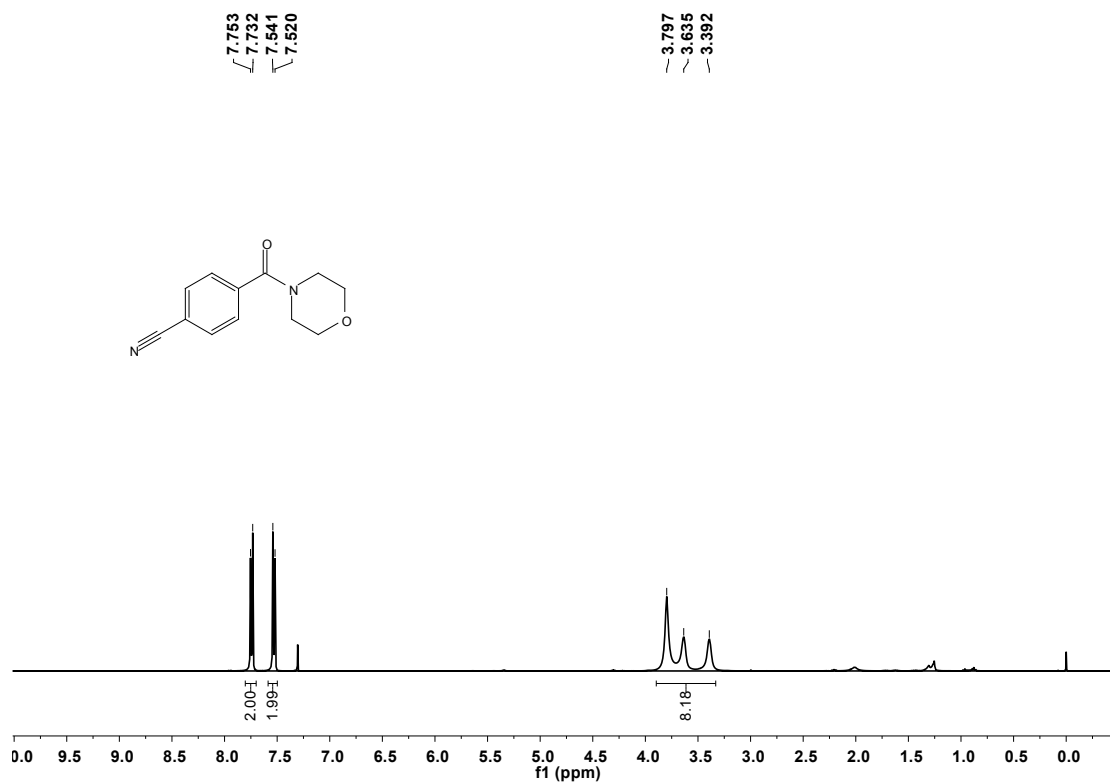

<sup>1</sup>H NMR spectrum of 4-(morpholine-4-carbonyl)benzonitrile (3ga)

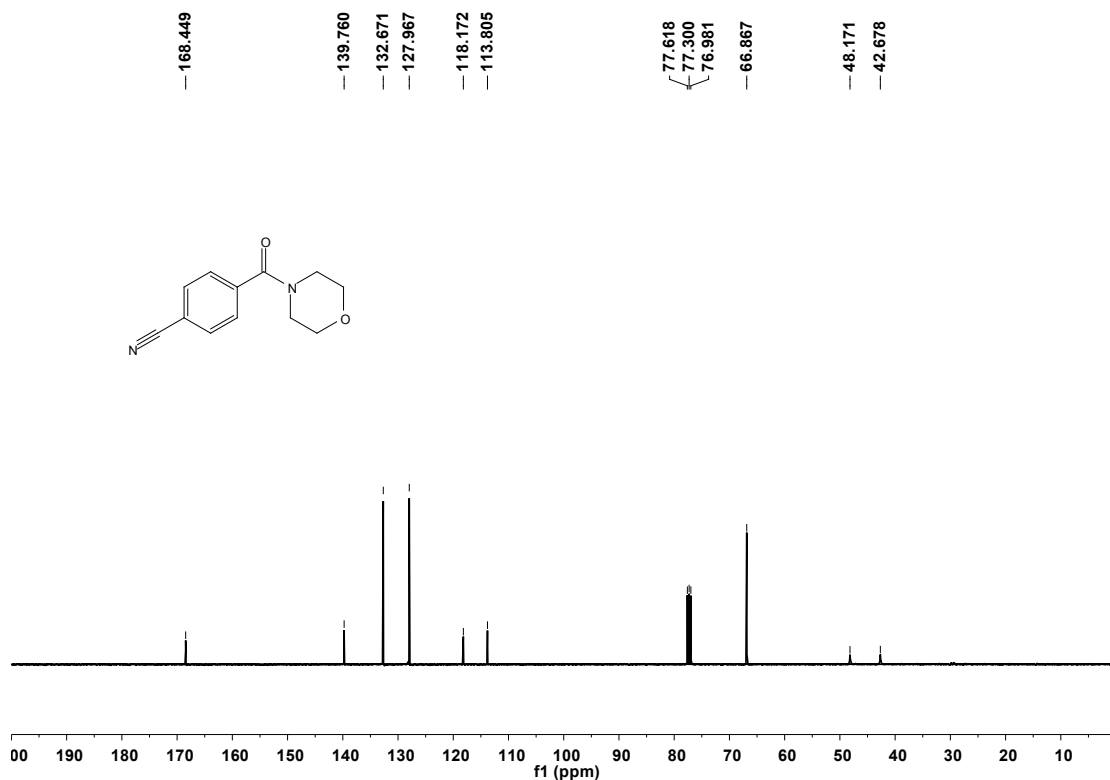

<sup>13</sup>C NMR spectrum of 4-(morpholine-4-carbonyl)benzonitrile (3ga)

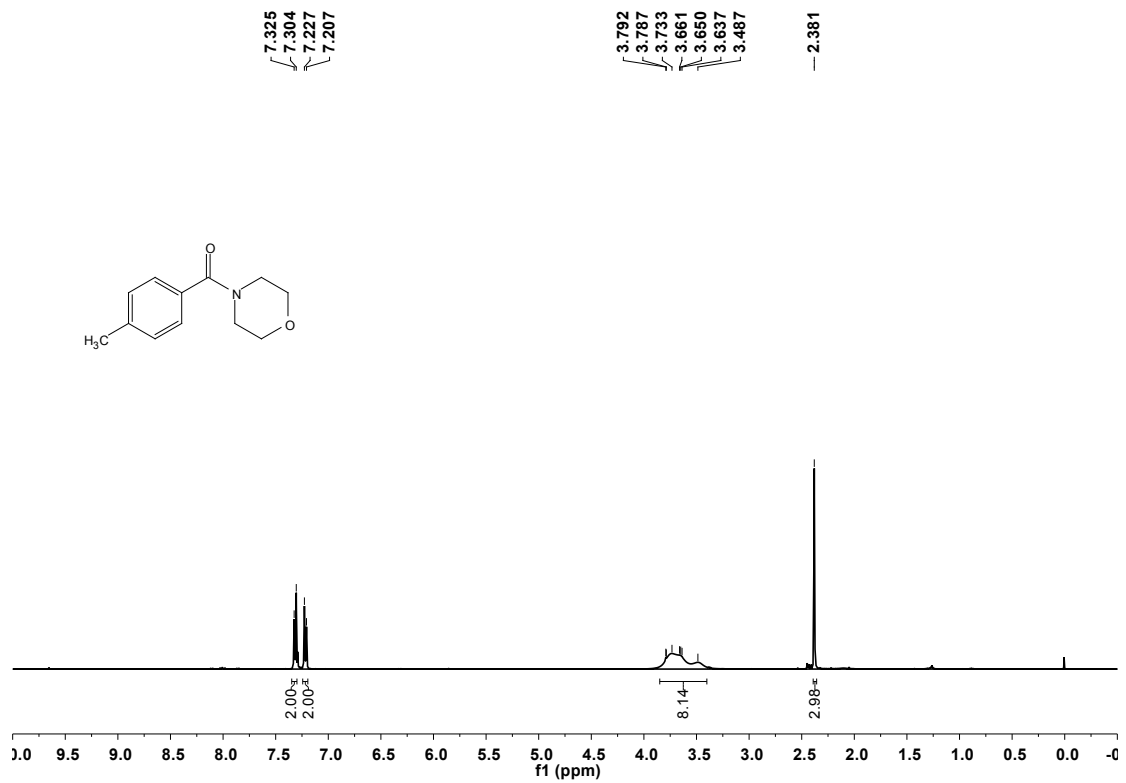

<sup>1</sup>H NMR spectrum of morpholino(p-tolyl)methanone (3ha)

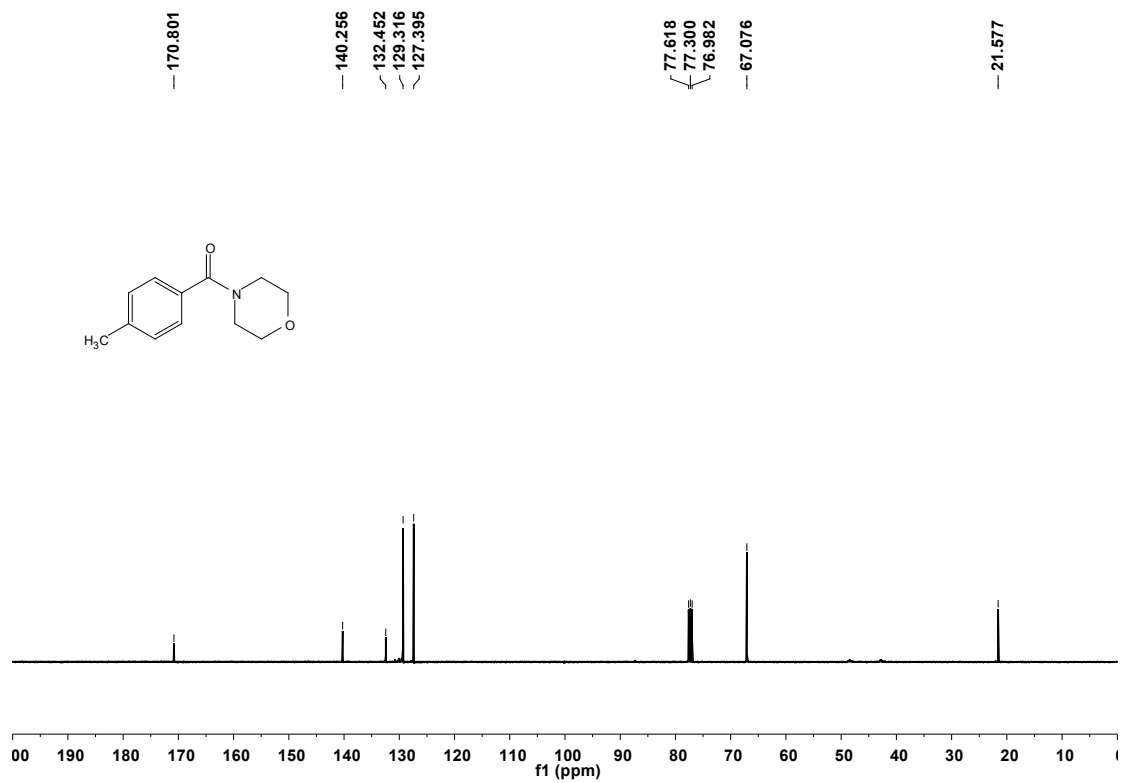

<sup>13</sup>C NMR spectrum of morpholino(p-tolyl)methanone (3ha)

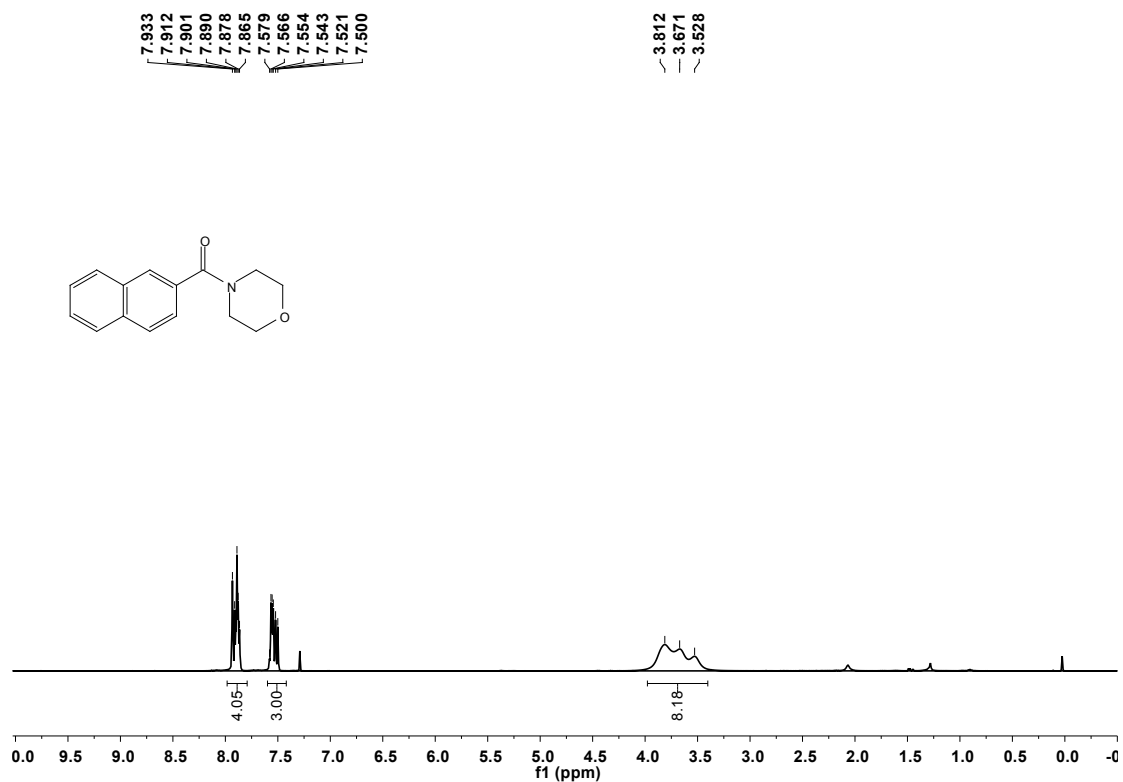

**<sup>1</sup>H NMR spectrum of morpholino(naphthalen-2-yl)methanone (3ia)**

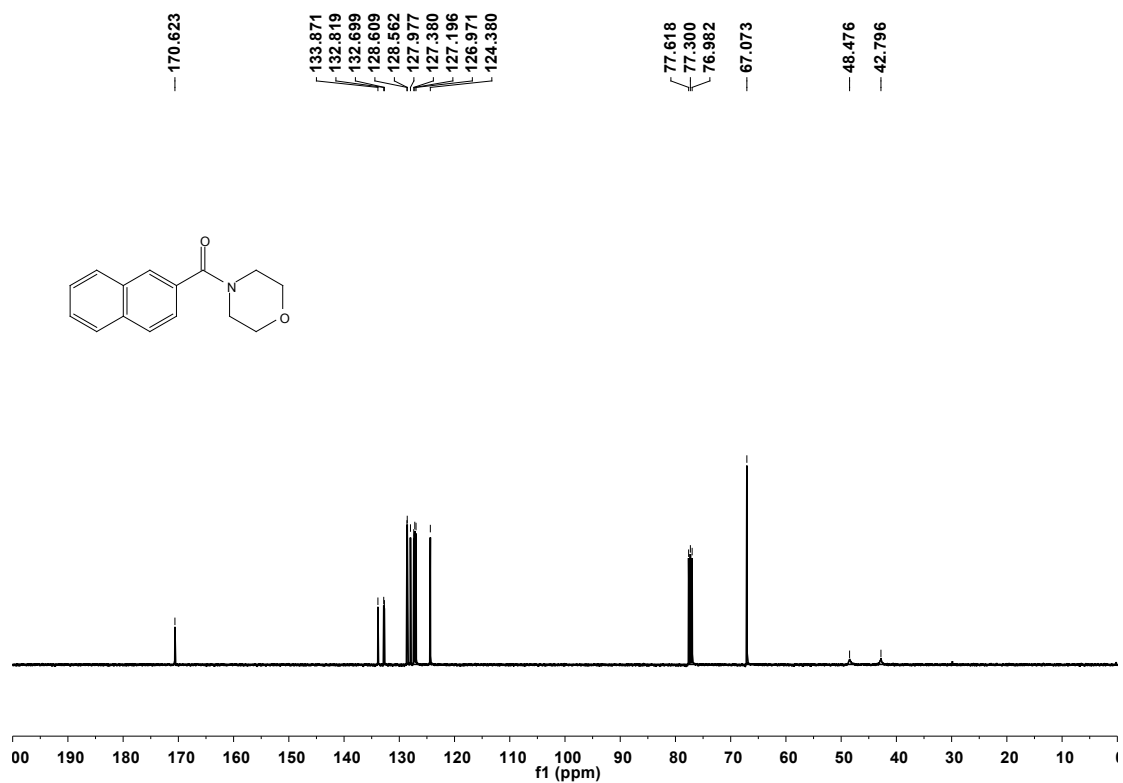

**<sup>13</sup>C NMR spectrum of morpholino(naphthalen-2-yl)methanone (3ia)**

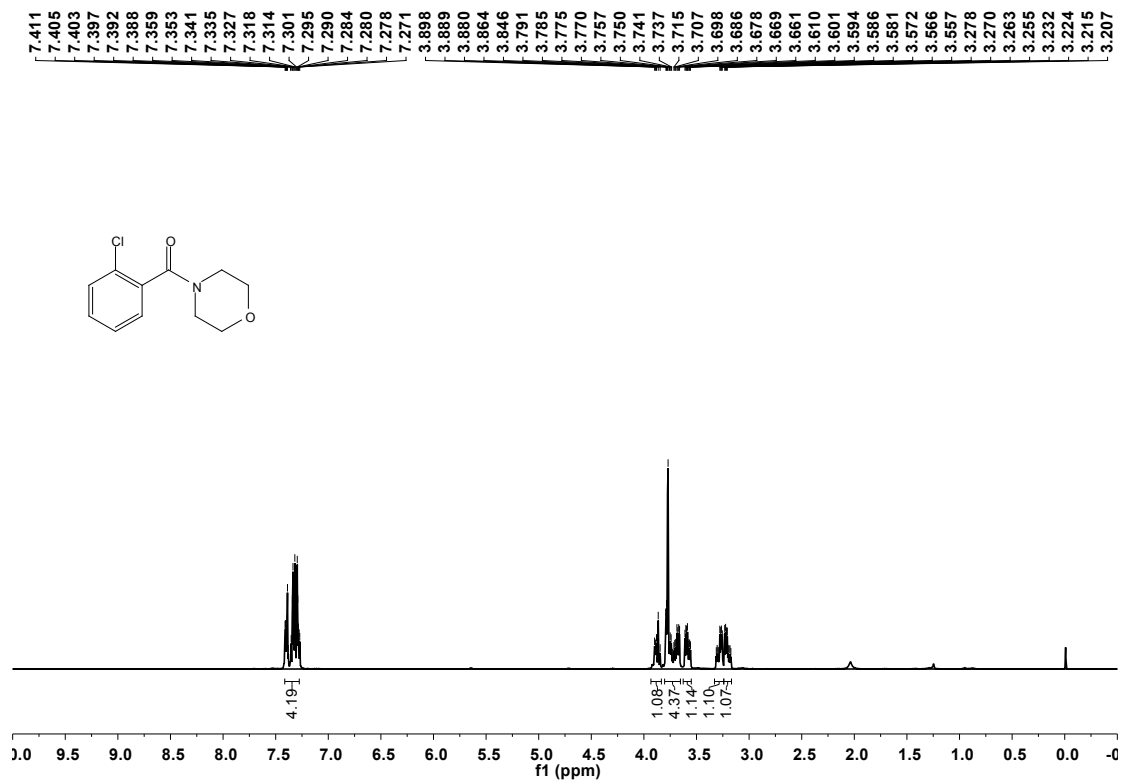

<sup>1</sup>H NMR spectrum of (2-chlorophenyl)(morpholino)methanone (3ja)

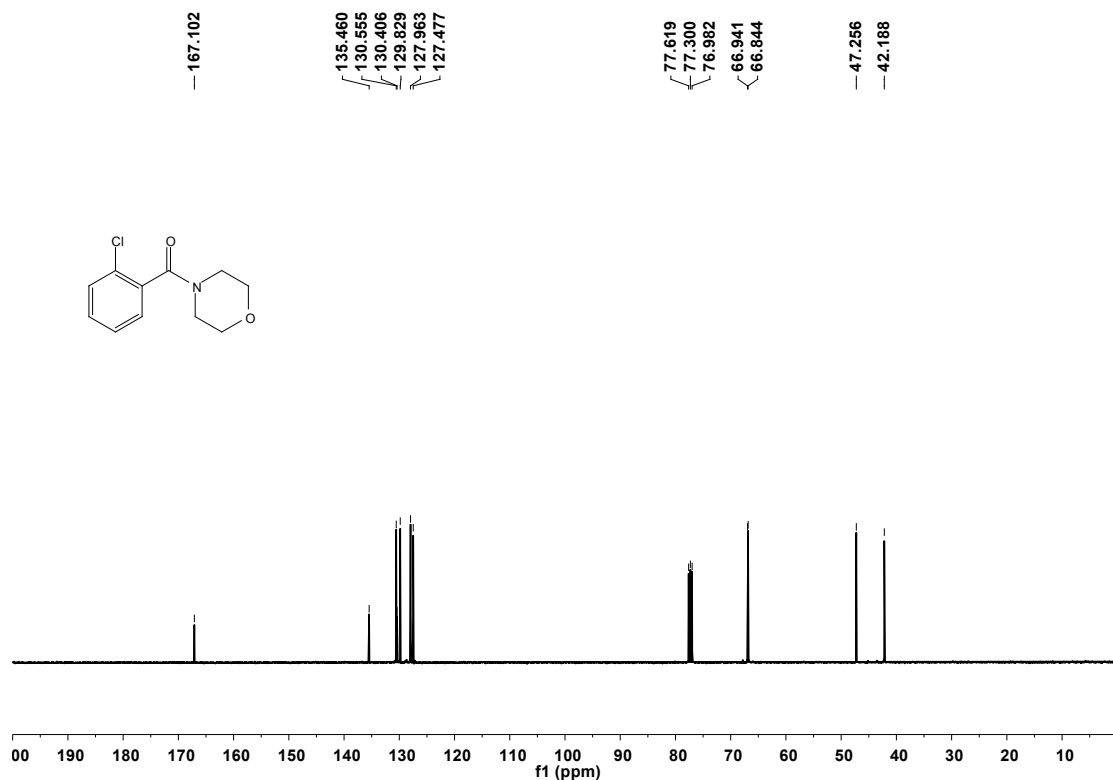

<sup>13</sup>C NMR spectrum of (2-chlorophenyl)(morpholino)methanone (3ja)

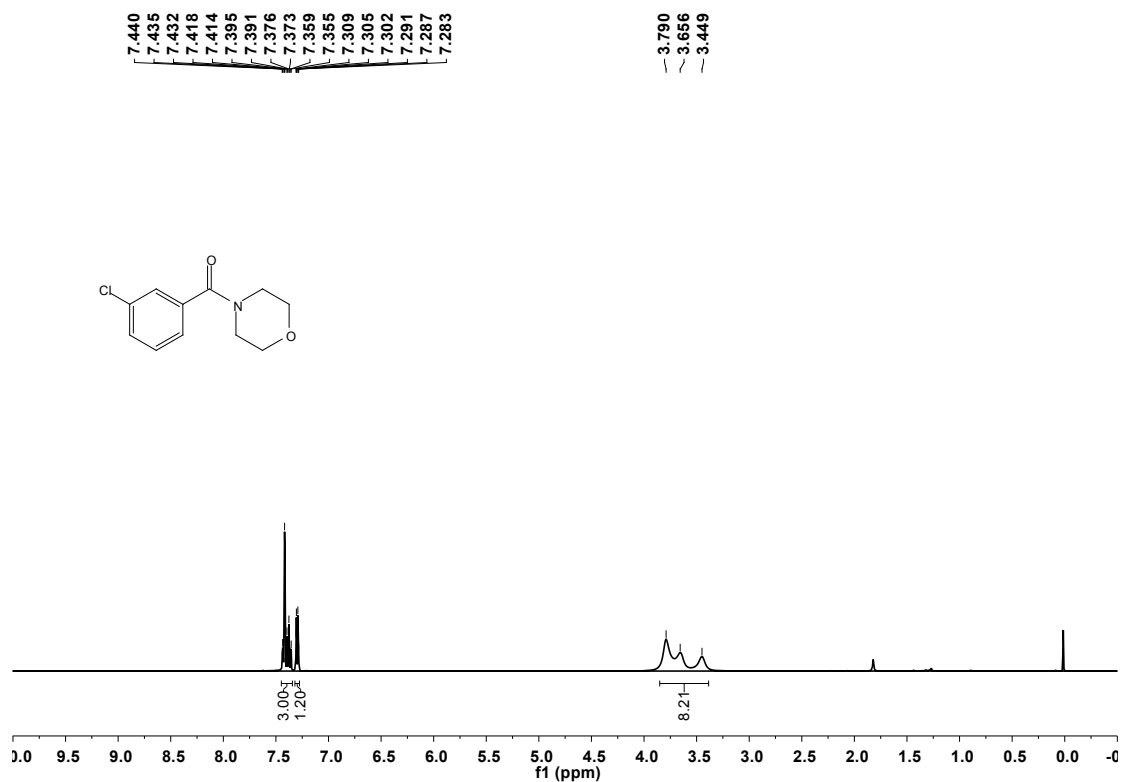

**<sup>1</sup>H NMR spectrum of (3-chlorophenyl)(morpholino)methanone (3ka)**

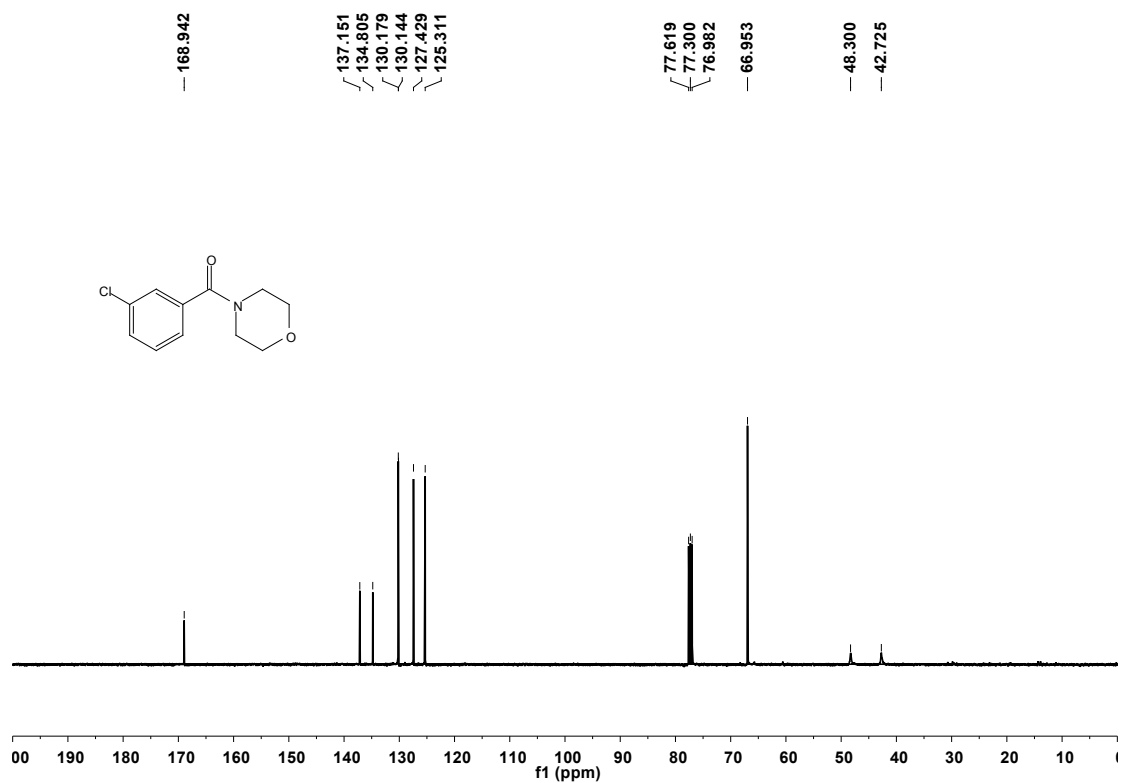

**<sup>13</sup>C NMR spectrum of (3-chlorophenyl)(morpholino)methanone (3ka)**

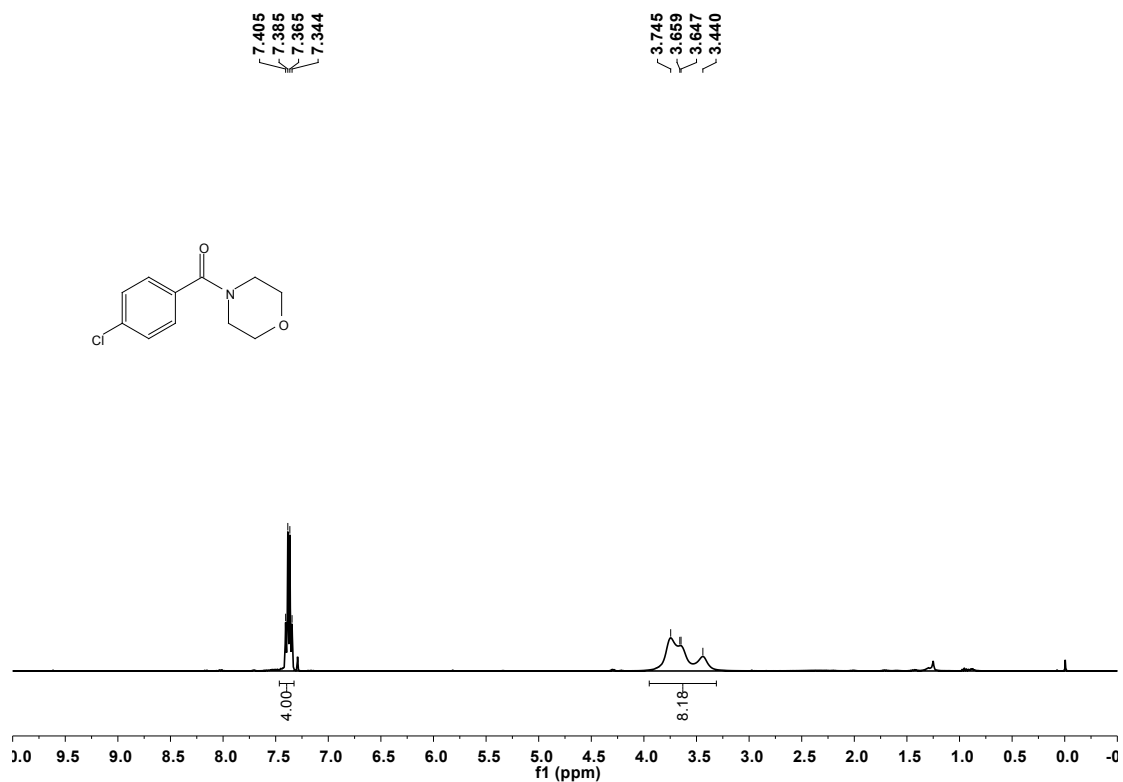

<sup>1</sup>H NMR spectrum of (4-chlorophenyl)(morpholino)methanone (3a)

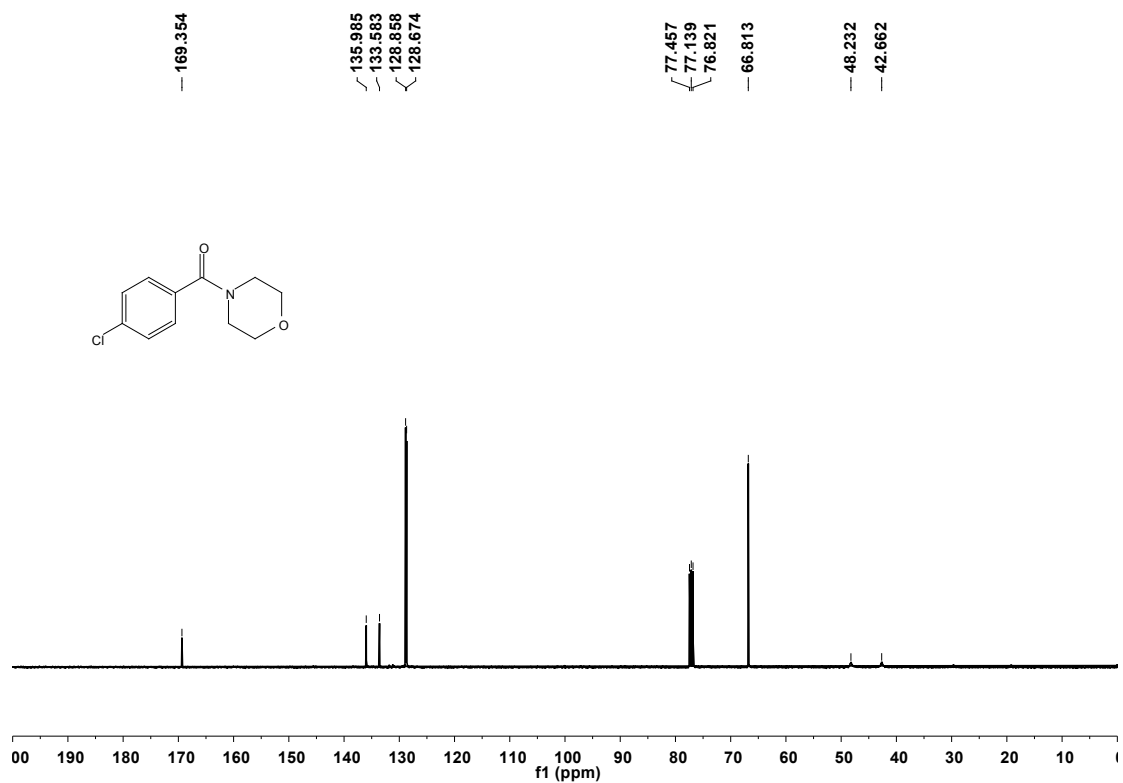

<sup>13</sup>C NMR spectrum of (4-chlorophenyl)(morpholino)methanone (3a)

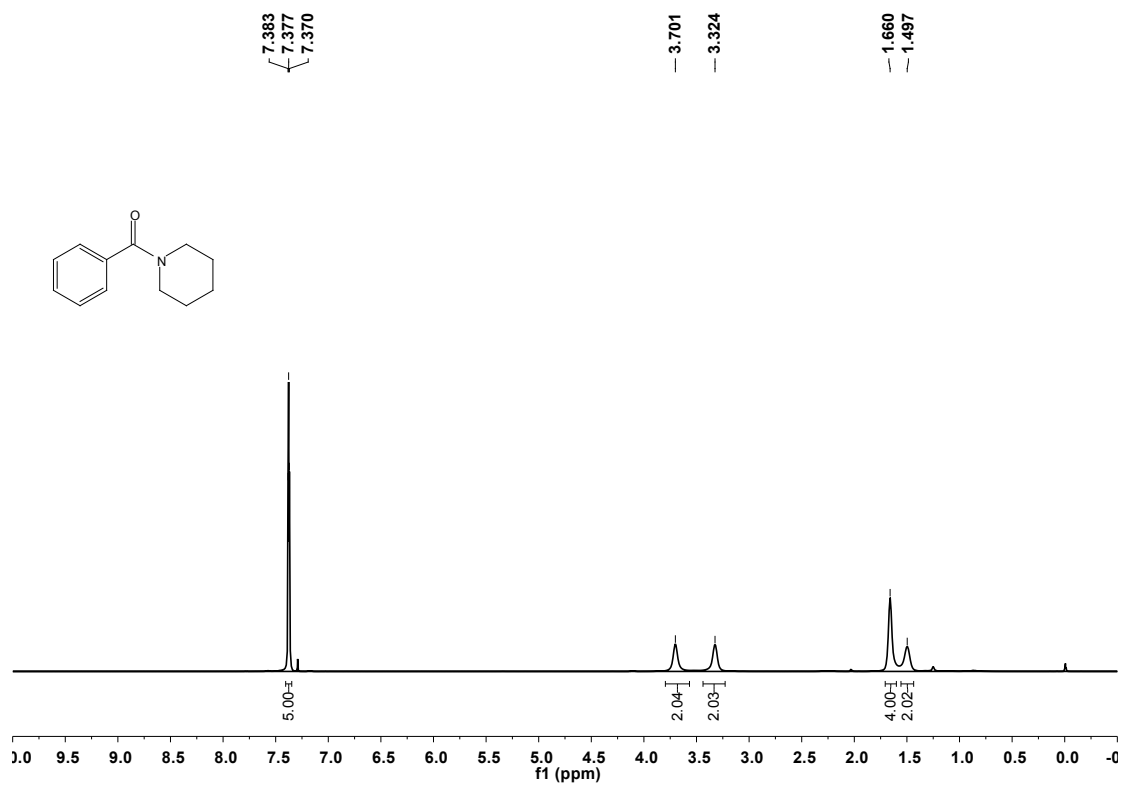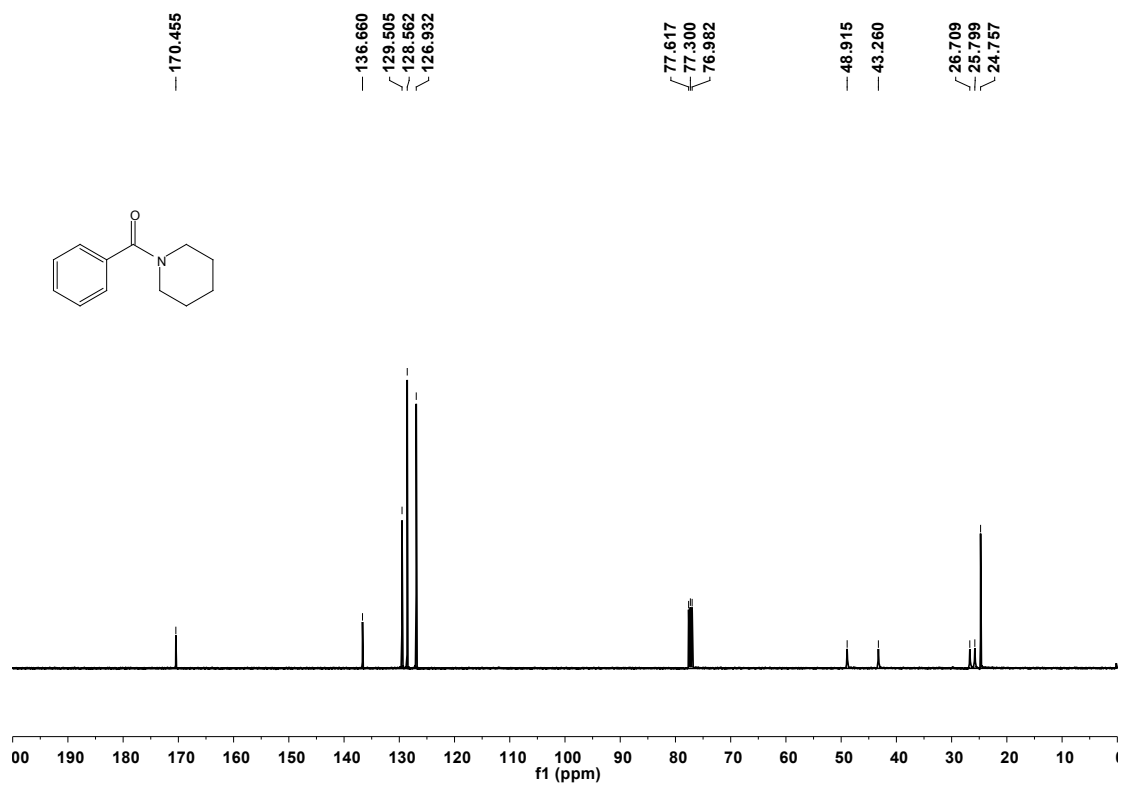



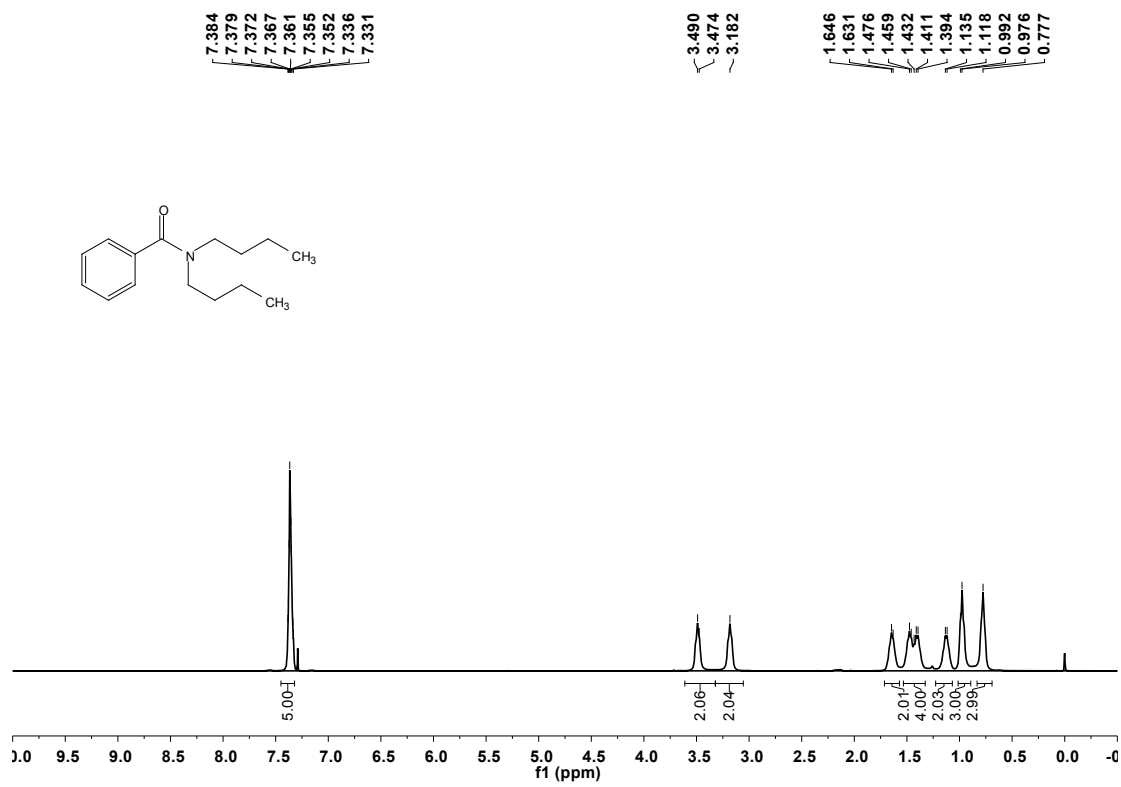

<sup>1</sup>H NMR spectrum of N,N-dibutylbenzamide (3ac)

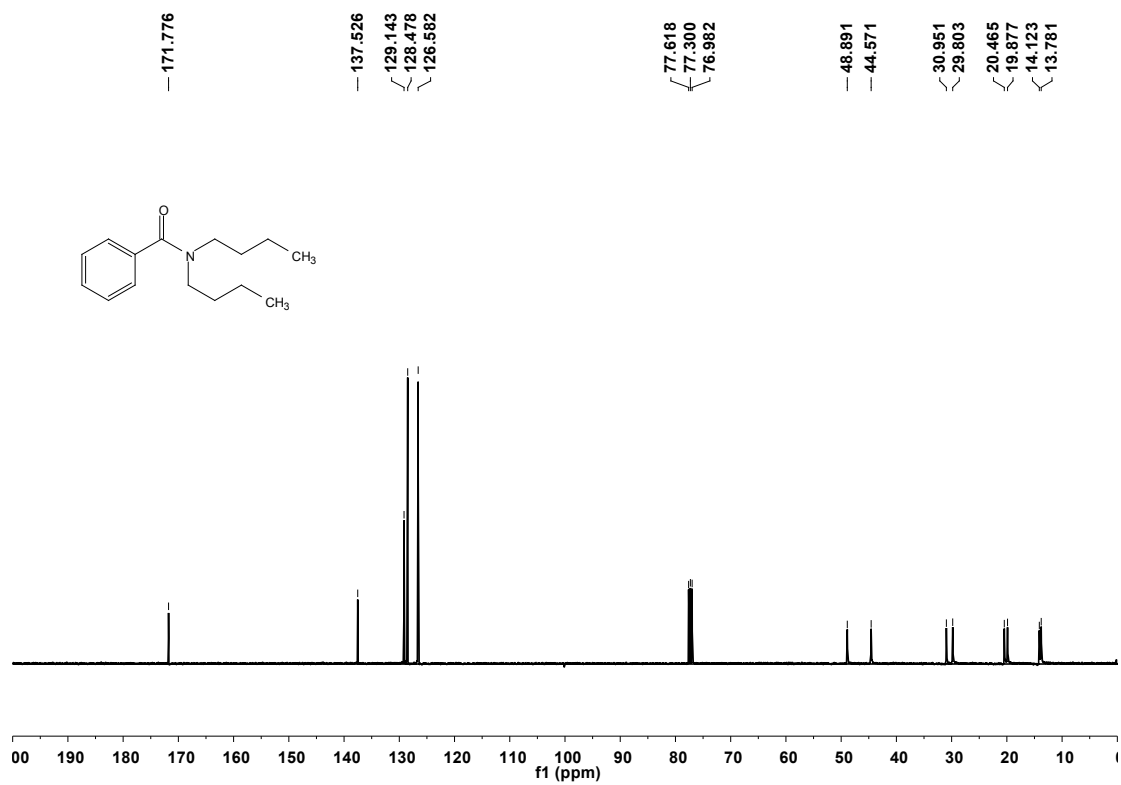

<sup>13</sup>C NMR spectrum of N,N-dibutylbenzamide (3ac)

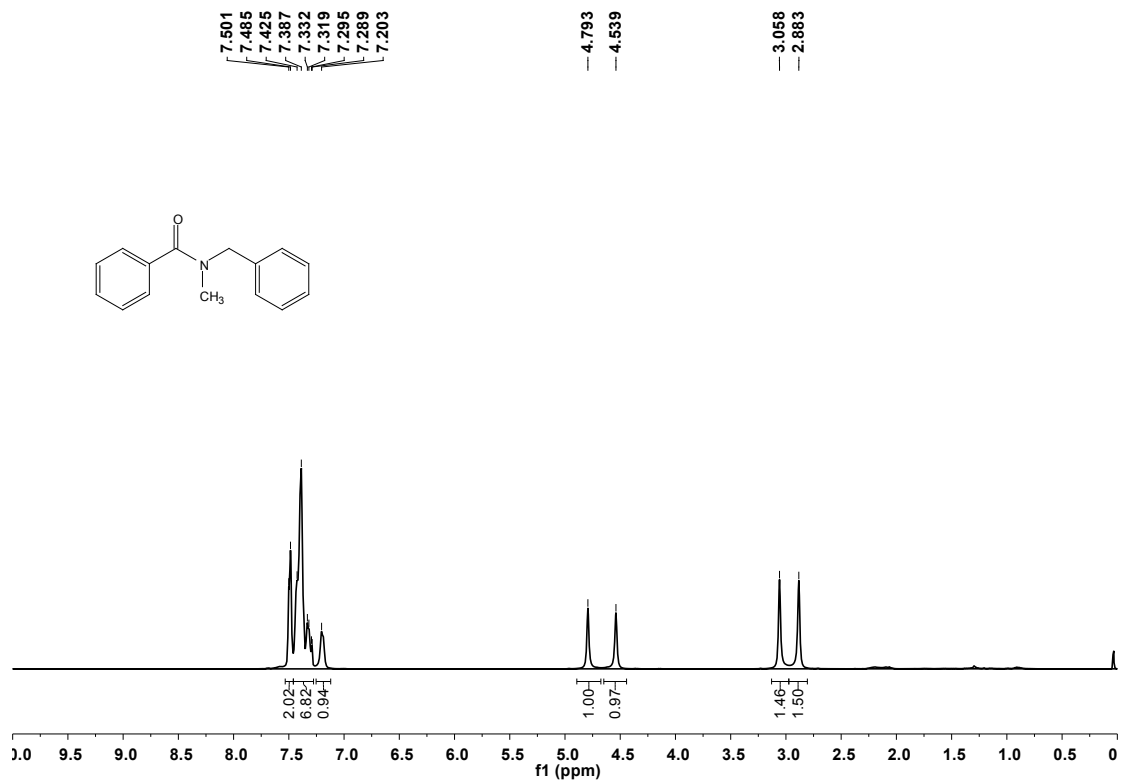

<sup>1</sup>H NMR spectrum of N-benzyl-N-methylbenzamide (3ad)

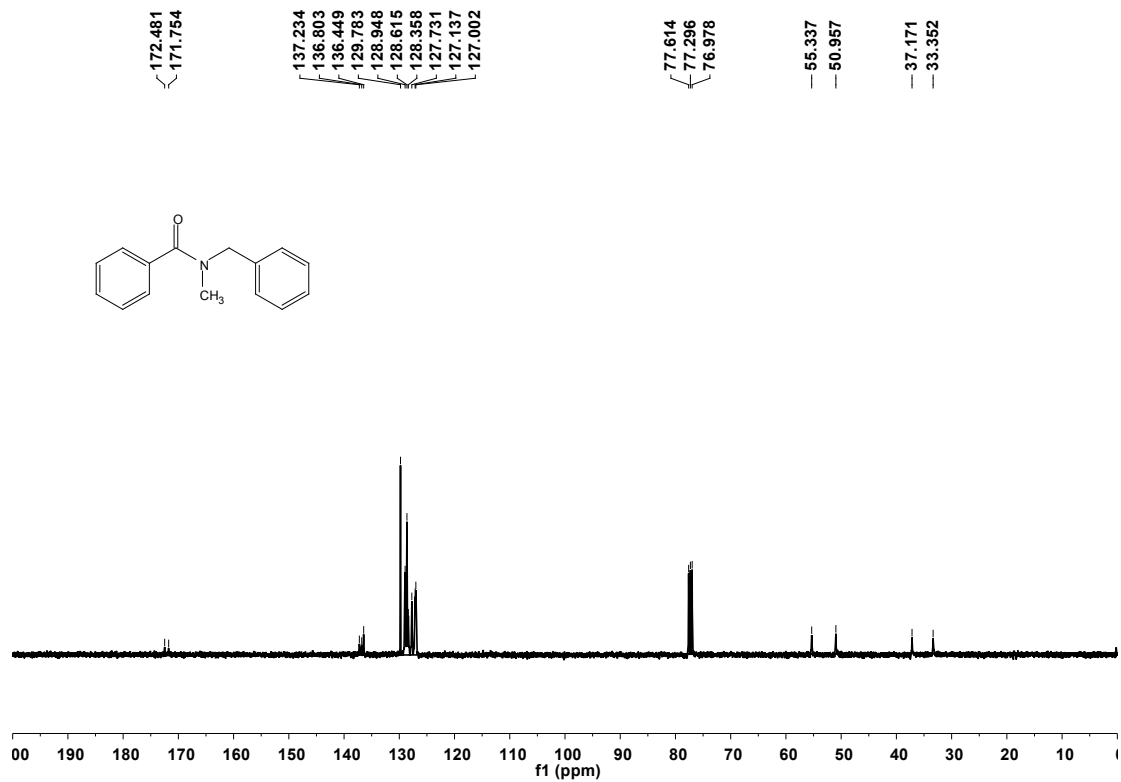

<sup>13</sup>C NMR spectrum of N-benzyl-N-methylbenzamide (3ad)
